# Supplementary material for: Brain aging comprises many modes of structural and functional change with distinct genetic and biophysical associations
Source: eLife. 2020 Mar 5;9:e52677. doi: 10.7554/eLife.52677 (PMC7162660; doi:10.7554/eLife.52677)
Supplement: Figure 4—source data 1. [file elife-52677-fig4-data1.xlsx]

## Sheet: Sheet 1
Mode-cluster	Mode-cluster IDPs	Mode-cluster nIDPs	Modes (IDPs and nIDPs)	Genes
16	CSF/ventricle volume (both normalised for head size and not), fornix MD.	Non-fat body size (height, fat-free mass, lung capacity, grip strength, weight), metabolic rate, head bone density, cognitive speed, number of births. Diabetes, alcohol, smoking.	262 Fornix MD. 1162 CSF/ventricle volume. Head bone area, TV time, cognitive score. 1262 Thalamus volume. Body size. 1362 Fornix MO. 3862 Corona radiata FA.	TIE1 MED8 GNA12 GMNC
26	Grey volume, white volume.	Bone density (primarily head), non-fat body size (height, fat-free mass, lung capacity, weight), metabolic rate, ankle width. Number of older siblings, cognitive speed.	162 Total grey volume. Bone density (doubled effect in females), age at menopause. Alcohol, smoking. 1662 Amygdala/hippocampus volume. 1962 Amygdala/hippocampus volume. 2462 Medial-frontal cortical volume. 2562 Superior-frontal cortical volume. 3262 Parietal/occipital cortical volume. Maternal smoking, bone density, BMI. 4062 Precuneus cortical volume.	HRK DAAM1 FAM3C WNT16 CPED1
36	T1w cortical grey-white contrast.	BMI, weight, fat mass, haemoglobin.	562 Grey-white contrast, frontal. 1062 Grey-white contrast, non-frontal.	CREB3L4 CRTC2 SLC27A3 S100A16 STX6 WNT7A CD82 VCAN
46	MD in all white matter (particularly L2, L3).	Blood pressure / hypertension, multiple sclerosis.	462 SLF MD, white matter lesions. 662 Superior corona radiata MD. Head bone area, smoking. 762 External capsule MD. Blood pressure. 862 Uncinate MD. 962 Posterior thalamic radiation / ILF MD. 1462 White matter lesions, posterior corona radiata MD. Multiple sclerosis. 2162 Cerebral peduncle L2/L3. 2262 SLF MD. 2762 Inferior cingulum MD. 3062 Superior cingulate gyrus: L2/L3, MO/FA. 3462 Inferior ce…	VCAN ZSCAN26 ZSCAN23 HLA-K ZNF603P
56	rfMRI amplitudes (sensory, motor and cognitive).	BMI, fat, weight, haemoglobin red cell count, bone density, mobile phone use, income. Blood pressure, cardiac output, nervous feelings, sleep duration.	1762 Cerebellar/subcortical rfMRI amplitude. BMI, haemoglobin, weight, fat. 3162 Cognitive cortex rfMRI amplitude. Physical activity, blood pressure treatment, fat. 3362 Sensory/motor/cerebellar/subcortical rfMRI amplitude/connectivity. Heart rate, blood pressure, nervous feelings, night sleep duration, TV time, High SES / physical activity (mobile phone use, daytime sleeping, physical activity, …	PLCE1 INPP5A APOE
66	Cortical thickness.	BMI, weight, red cell count, head bone density.	1562 Superior/medial frontal cortical thickness. 2362 Precuneus/parietal. Birth weight. 2662 Left lateral frontal. 2862 Right lateral frontal. 2962 Sensory/motor (central superior). 3962 Left post-central superior. Number of older siblings. 4362 Right post-central superior.	MACF1 SLC39A8 / ZIP8 PAFAH1B1
-	362 Fornix MD. Height, weight. 1862 Tapetum MD. 2062 Thalamus volume. Height, bone density. 3562 Superior parietal cortex volume. 3662 Putamen volume. TV time. 3762 Subcortical T1 intensity. Weight, fat, nasal polyps. 4262 Cerebral peduncle / posterior internal capsule OD/FA/MO/L1. Body size, BMI. 4462 Hippocampal/medial volume/cortical-area. 4662 Left Brodmann 44 cortical area/volume. 4762 Later…
