# Supplementary material for: Brain aging comprises many modes of structural and functional change with distinct genetic and biophysical associations
Source: eLife journal article supplement (doi:10.7554/elife.52677), 2020-03-05
Supplement: supp [file elife_poa_e52677_Figure_1_figure_supplement_9.pdf › elife_poa_e52677_Figure_1_figure_supplement_9.pdf]

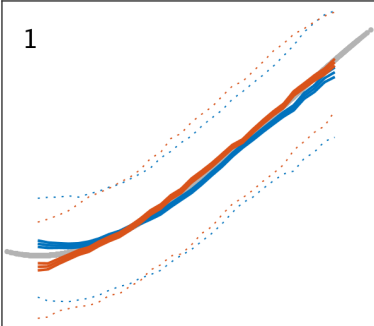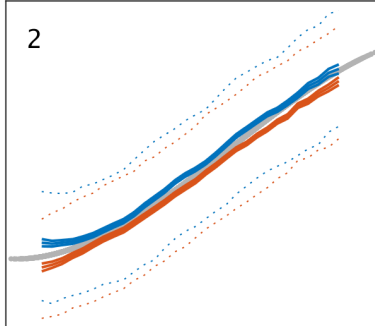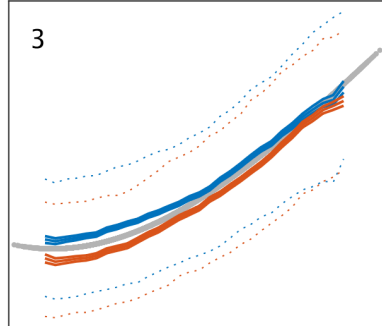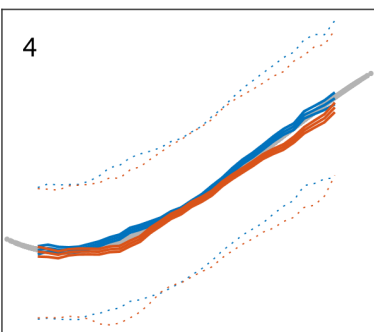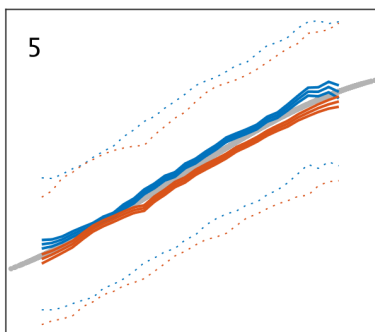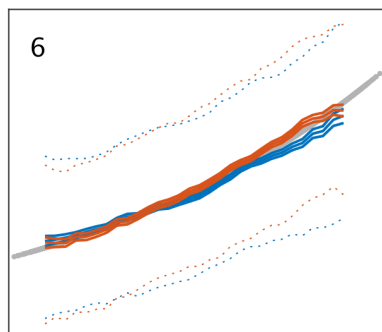

**Sex-separated age curves for mode-clusters**

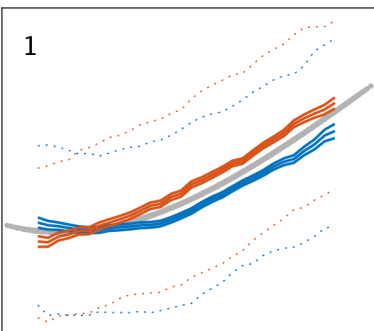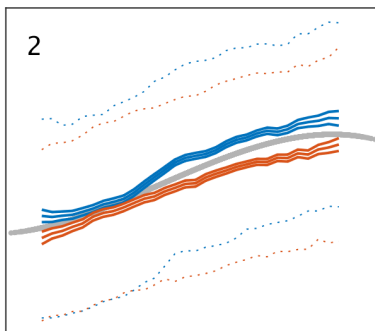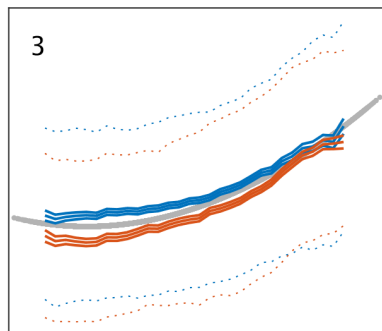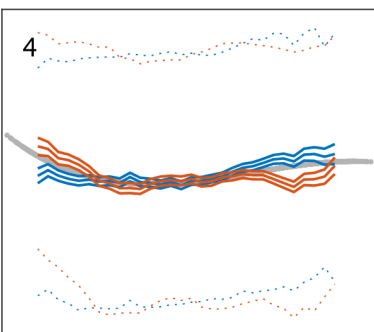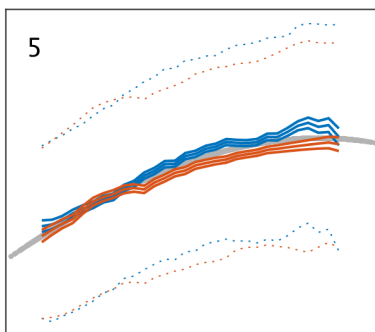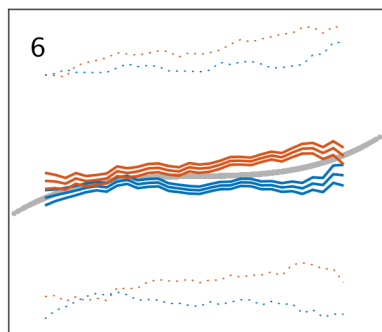

**Sex-separated age curves for partialled mode-clusters**
