# Supplementary figures and images for: Brain aging comprises many modes of structural and functional change with distinct genetic and biophysical associations
Source: eLife journal article supplement (doi:10.7554/elife.52677), 2020-03-05

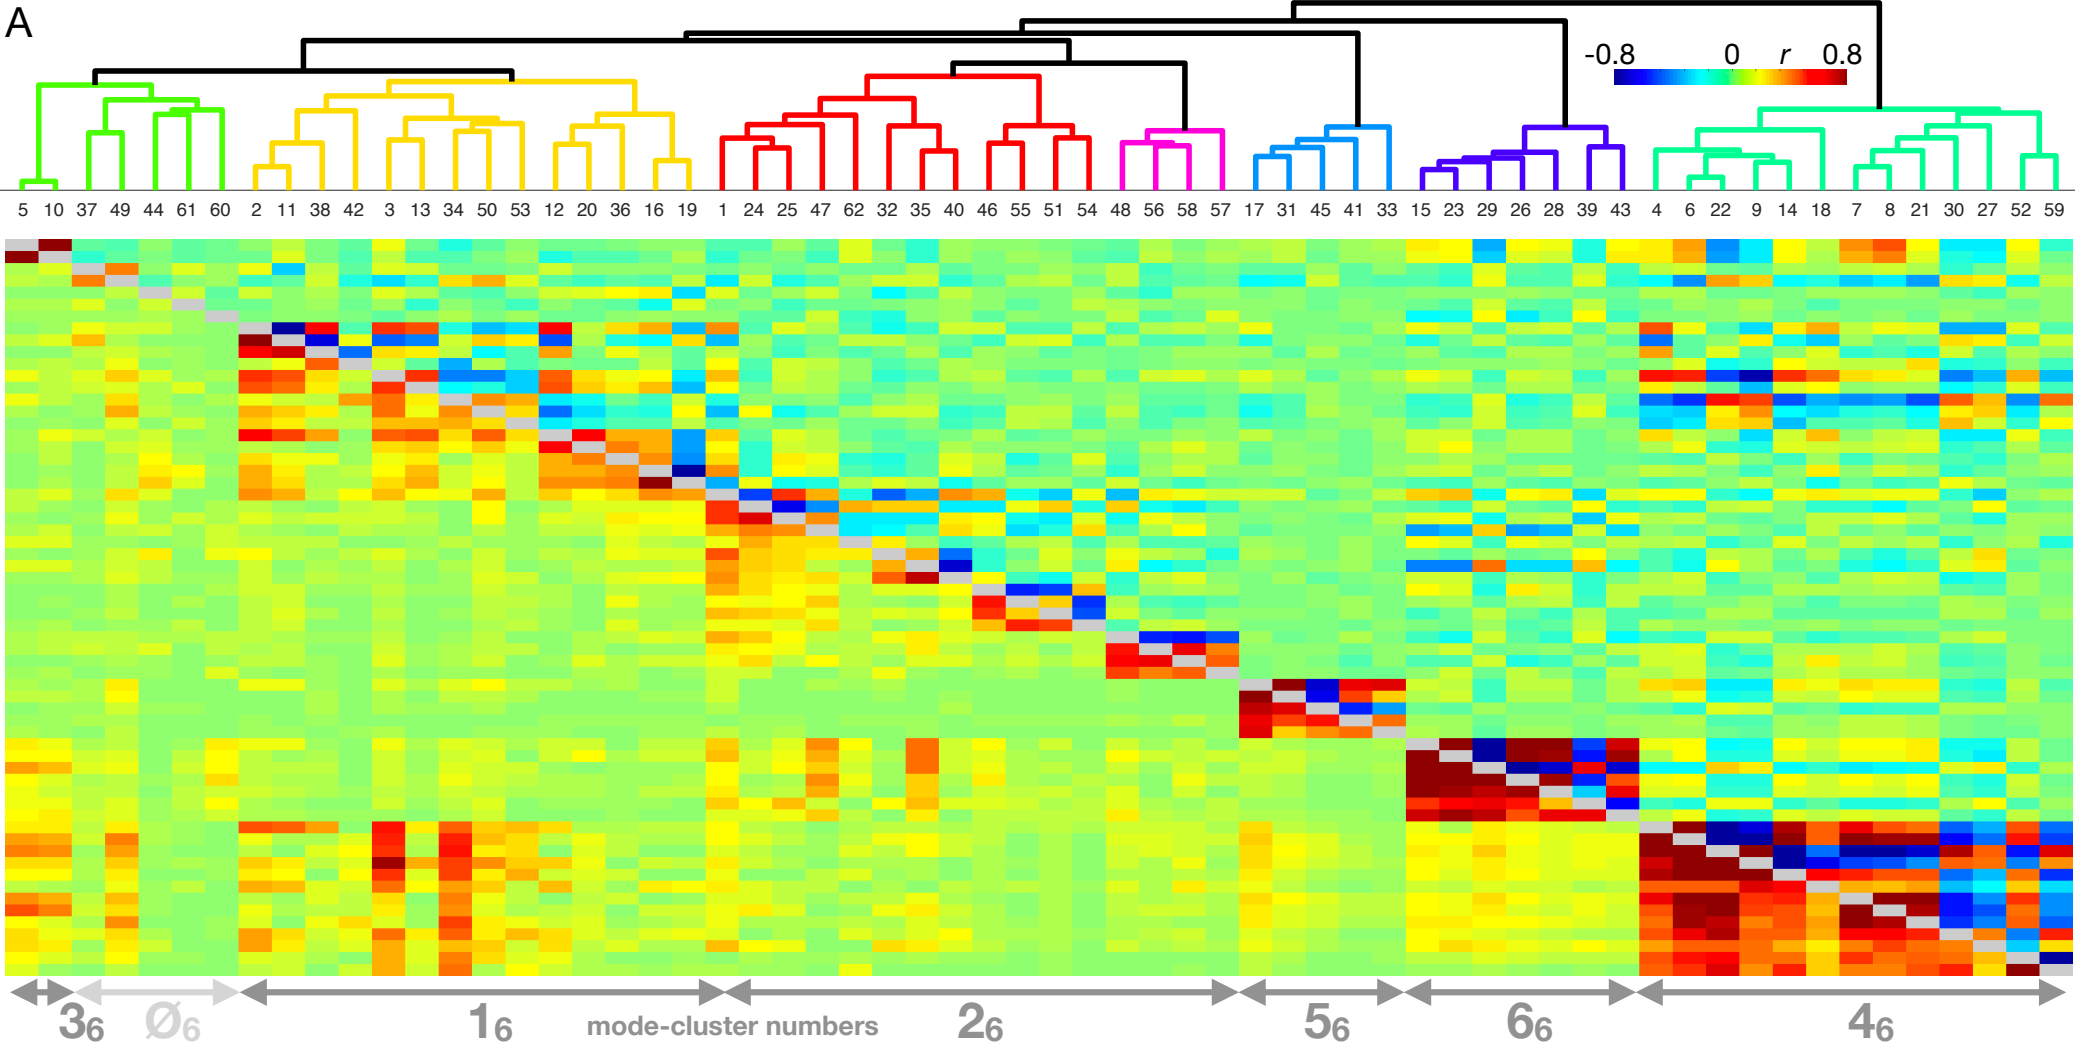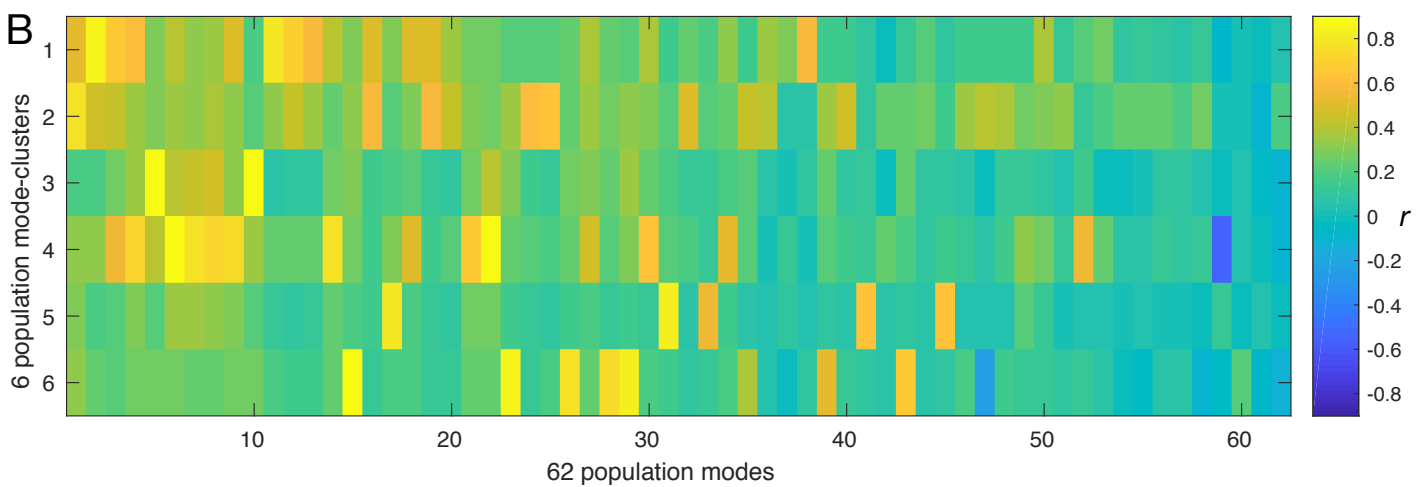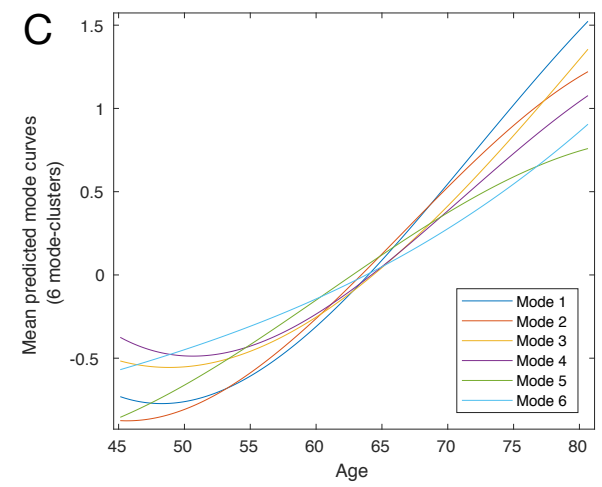

Supplement: supp [file elife_poa_e52677_Figure_1_figure_supplement_1.pdf › elife_poa_e52677_Figure_1_figure_supplement_1.pdf]

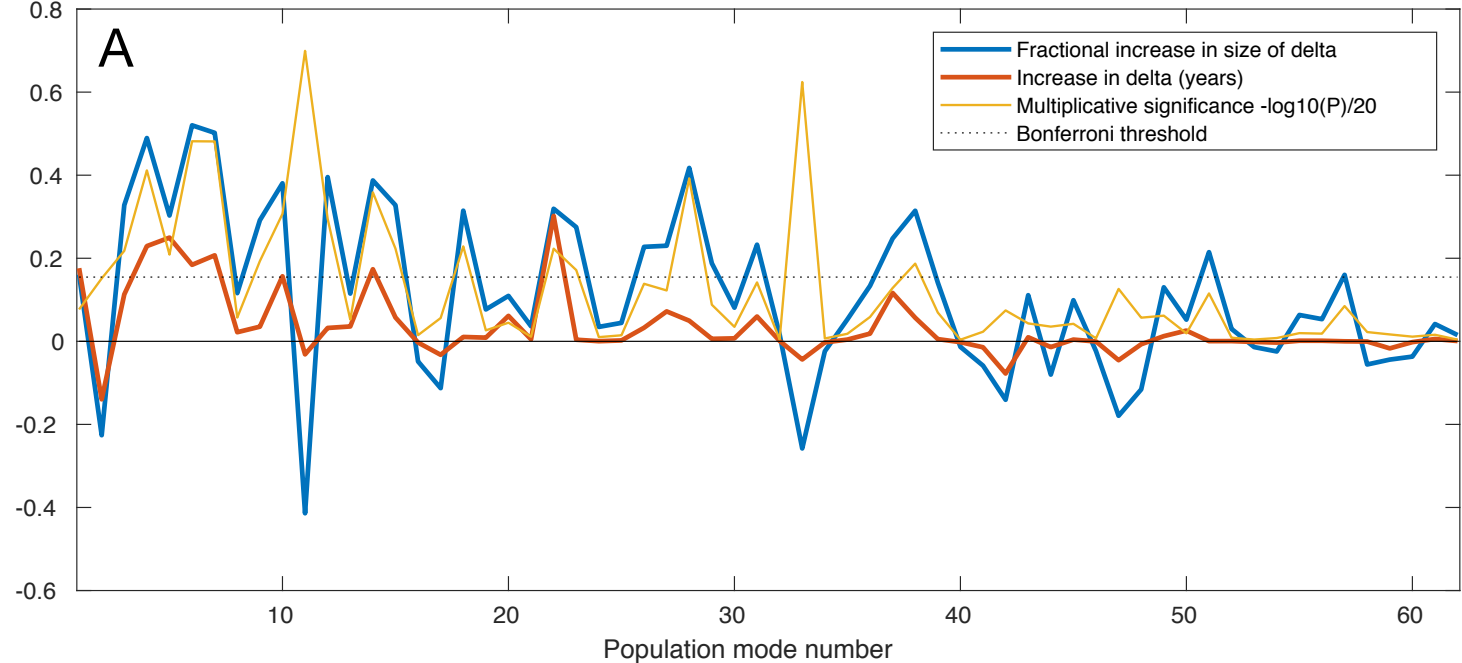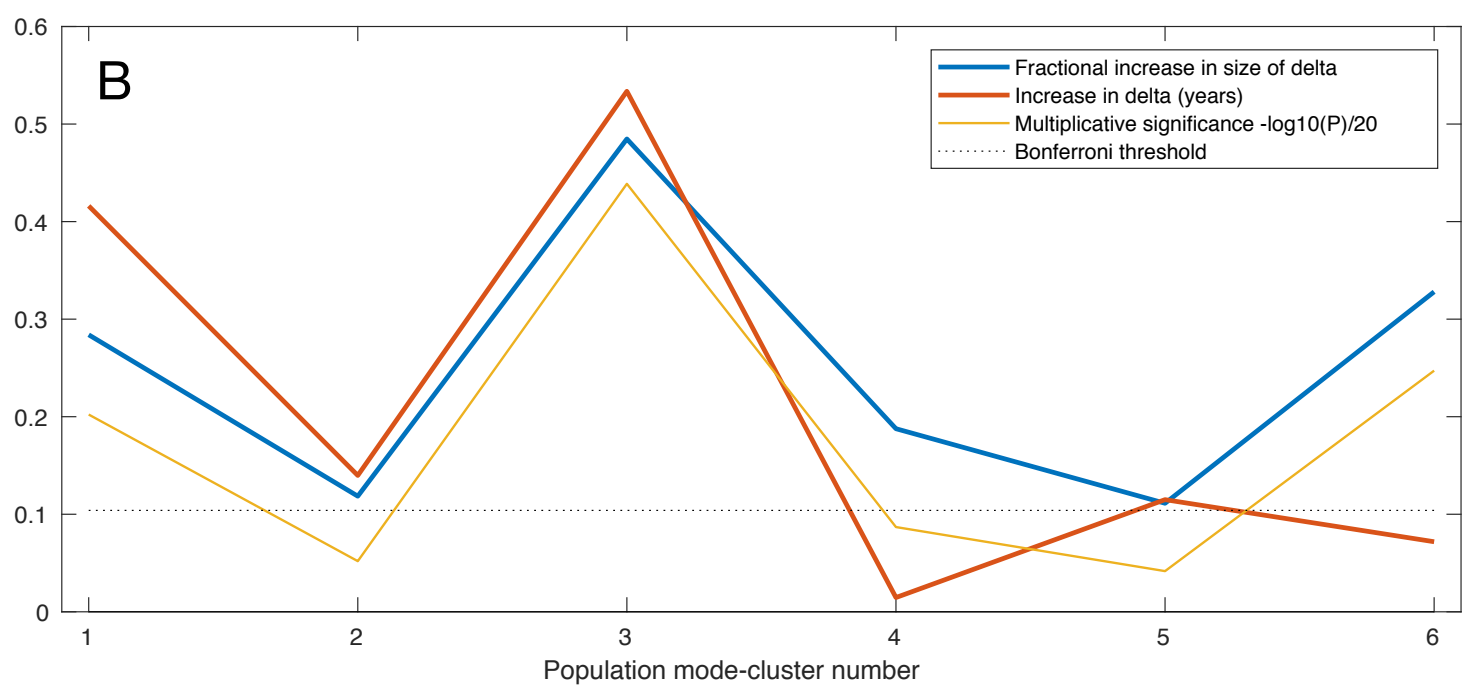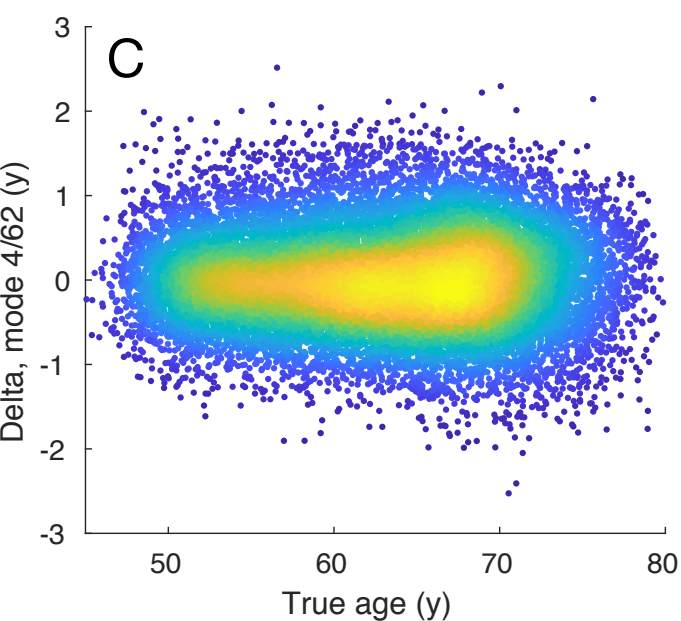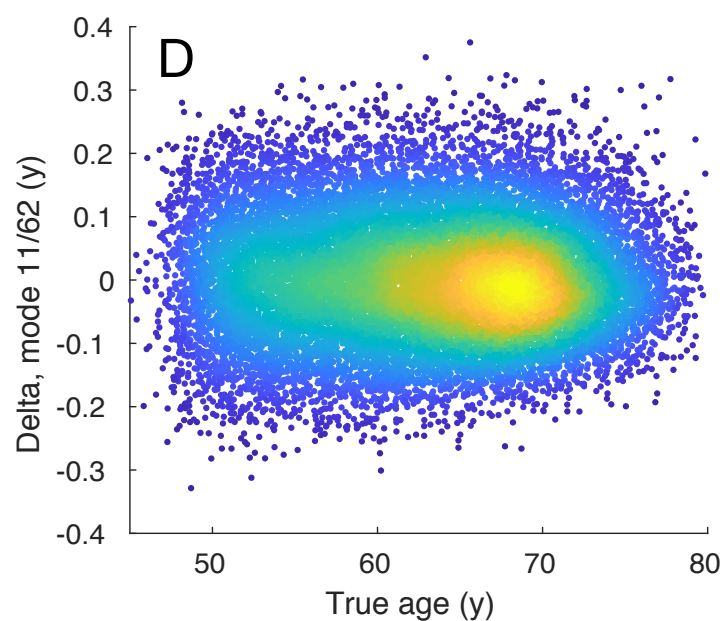

Supplement: supp [file elife_poa_e52677_Figure_1_figure_supplement_10.pdf › elife_poa_e52677_Figure_1_figure_supplement_10.pdf]

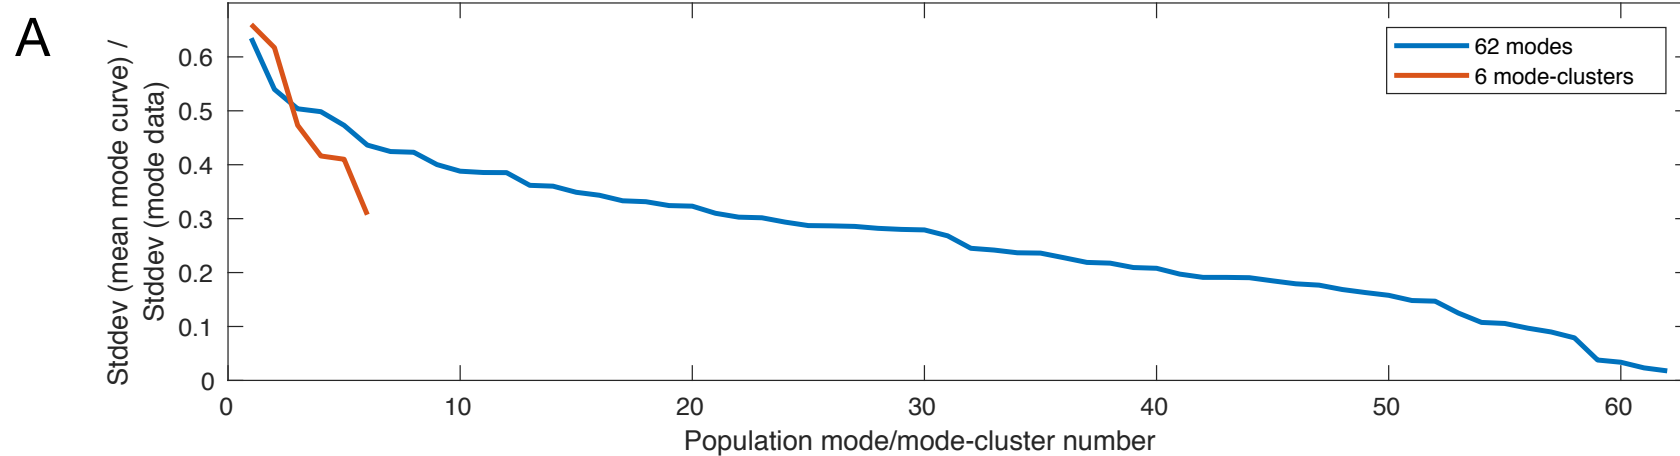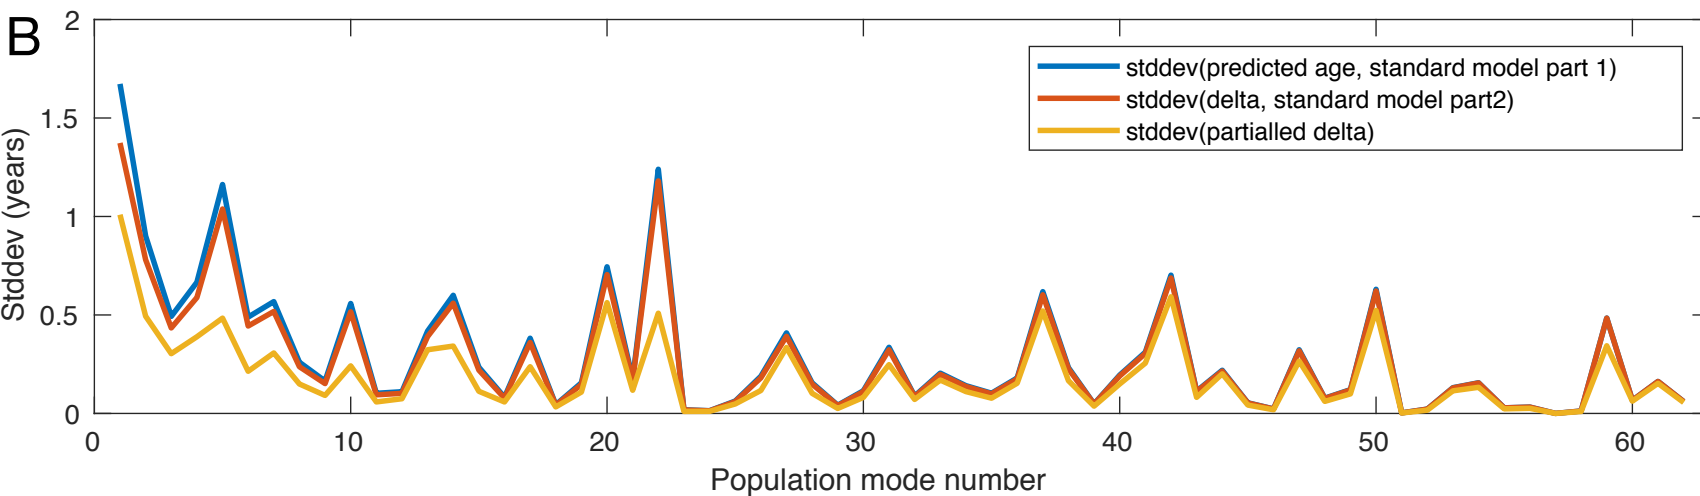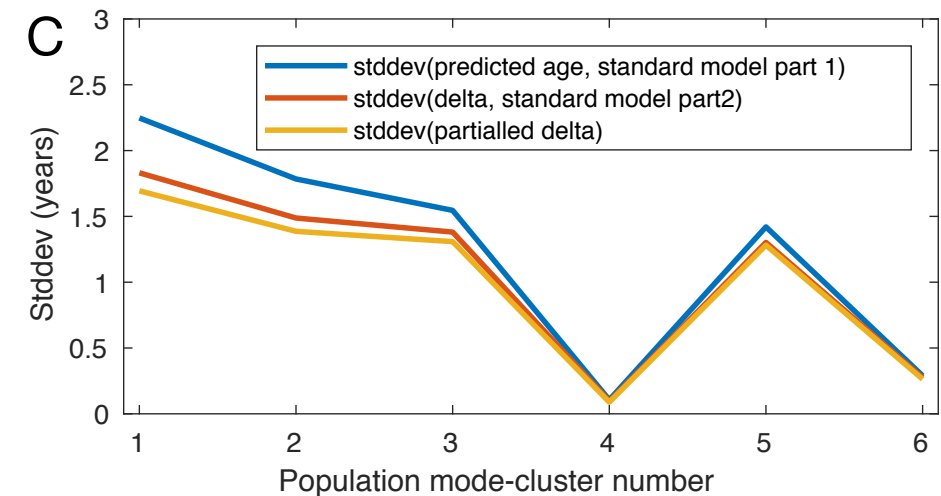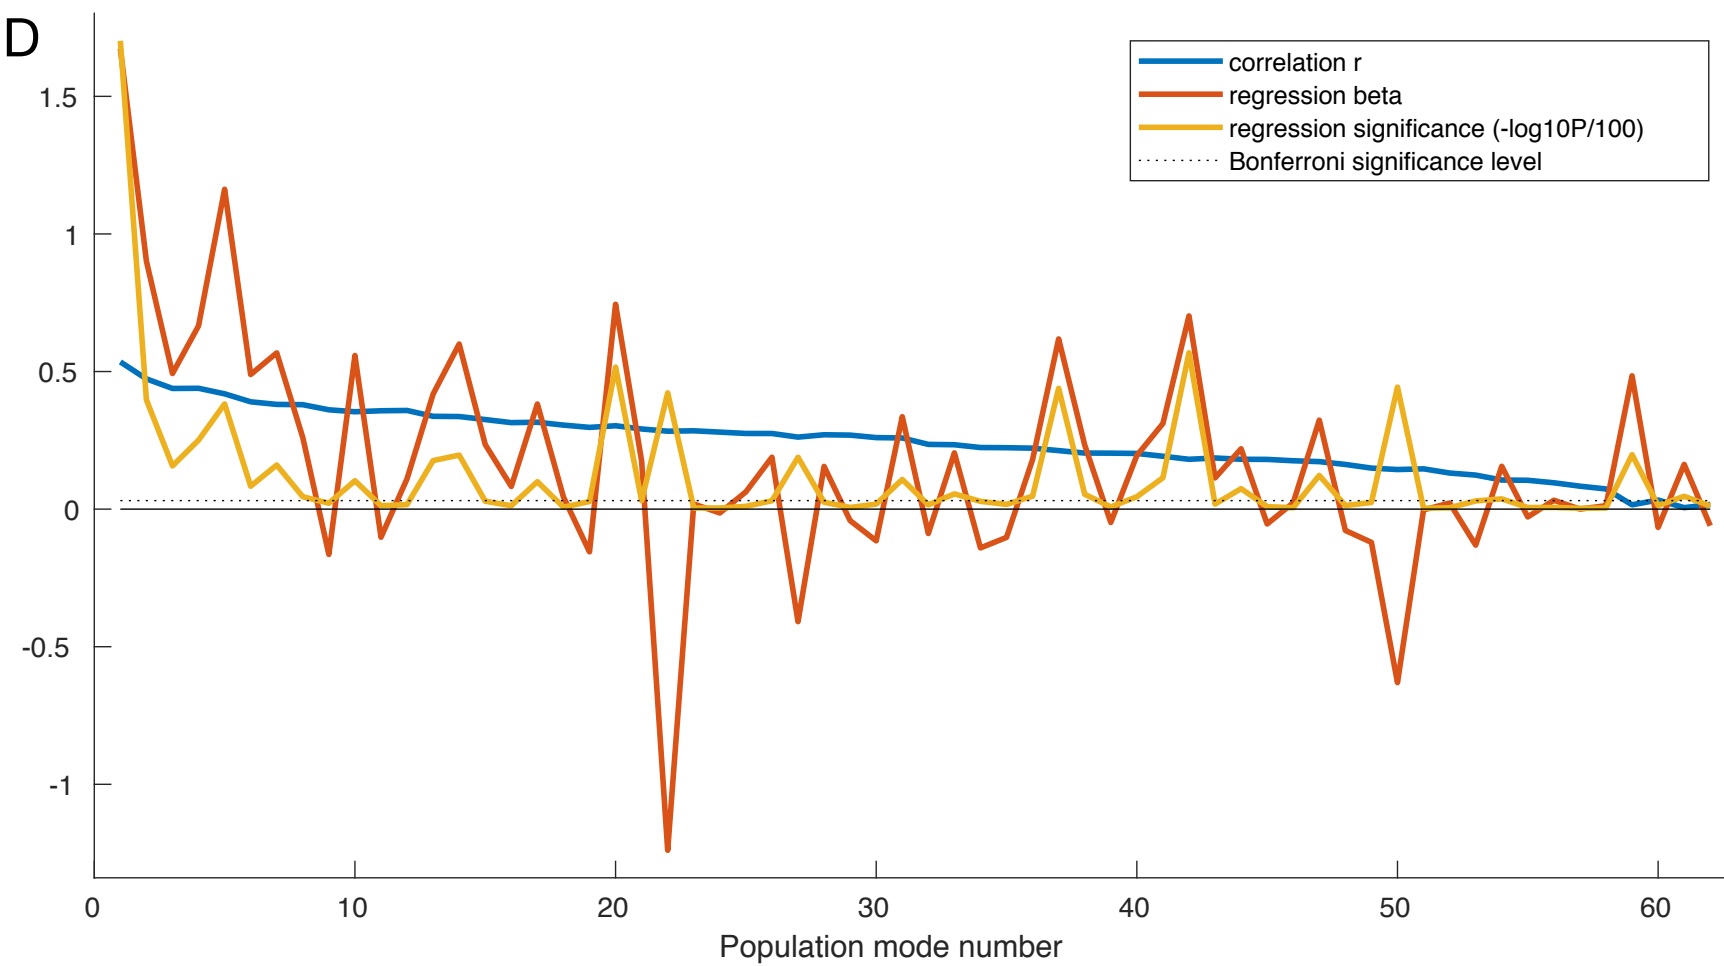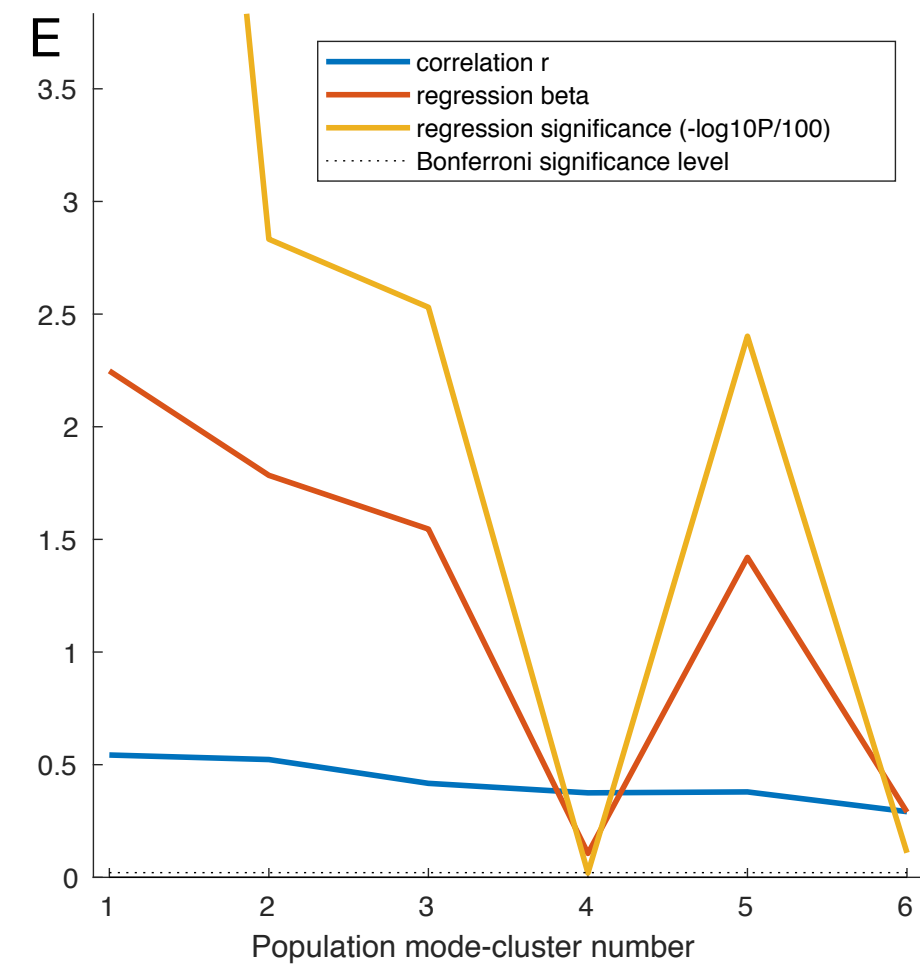

Supplement: supp [file elife_poa_e52677_Figure_1_figure_supplement_2.pdf › elife_poa_e52677_Figure_1_figure_supplement_2.pdf]

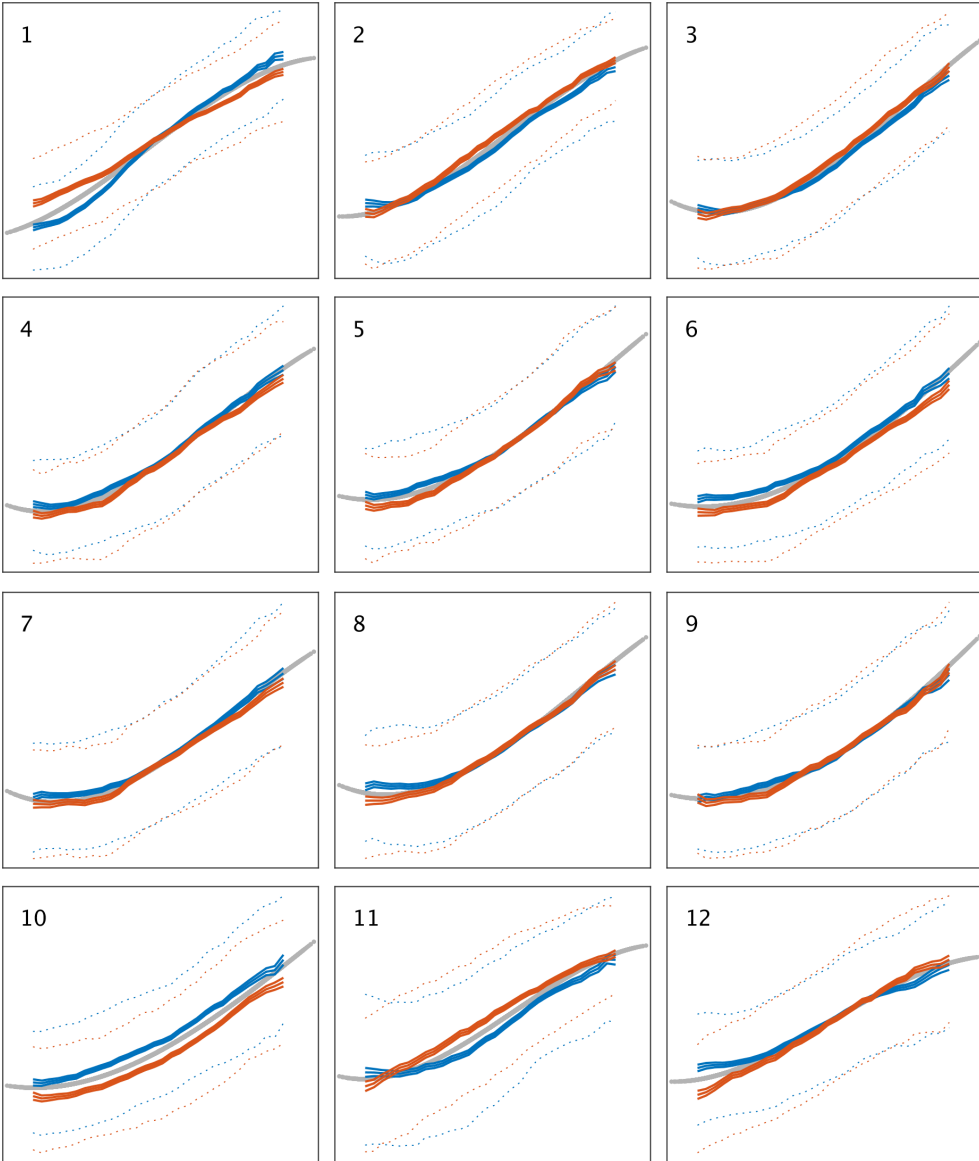

Sex-separated age curves for modes 1-12

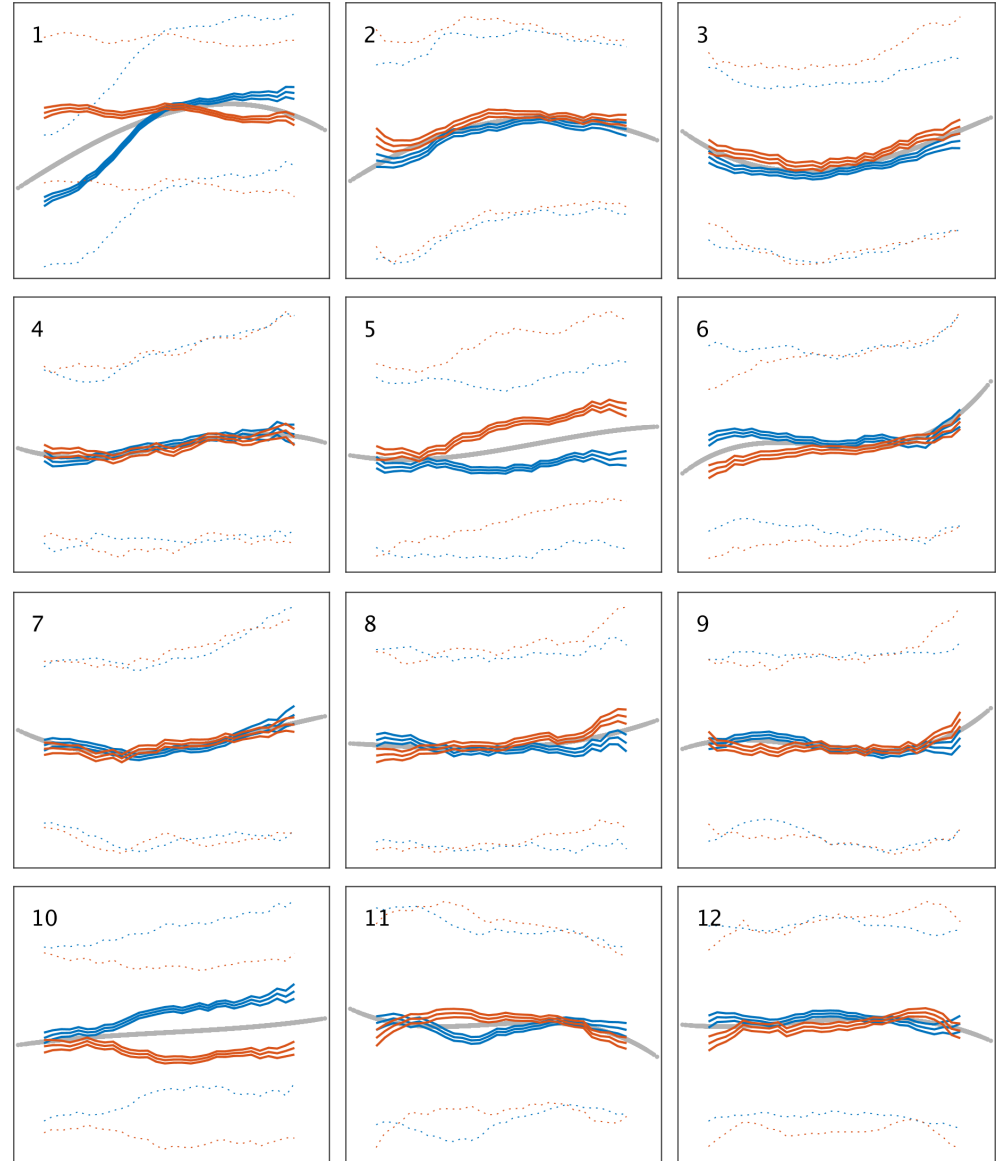

Sex-separated age curves for partialled modes 1-12

Supplement: supp [file elife_poa_e52677_Figure_1_figure_supplement_3.pdf › elife_poa_e52677_Figure_1_figure_supplement_3.pdf]

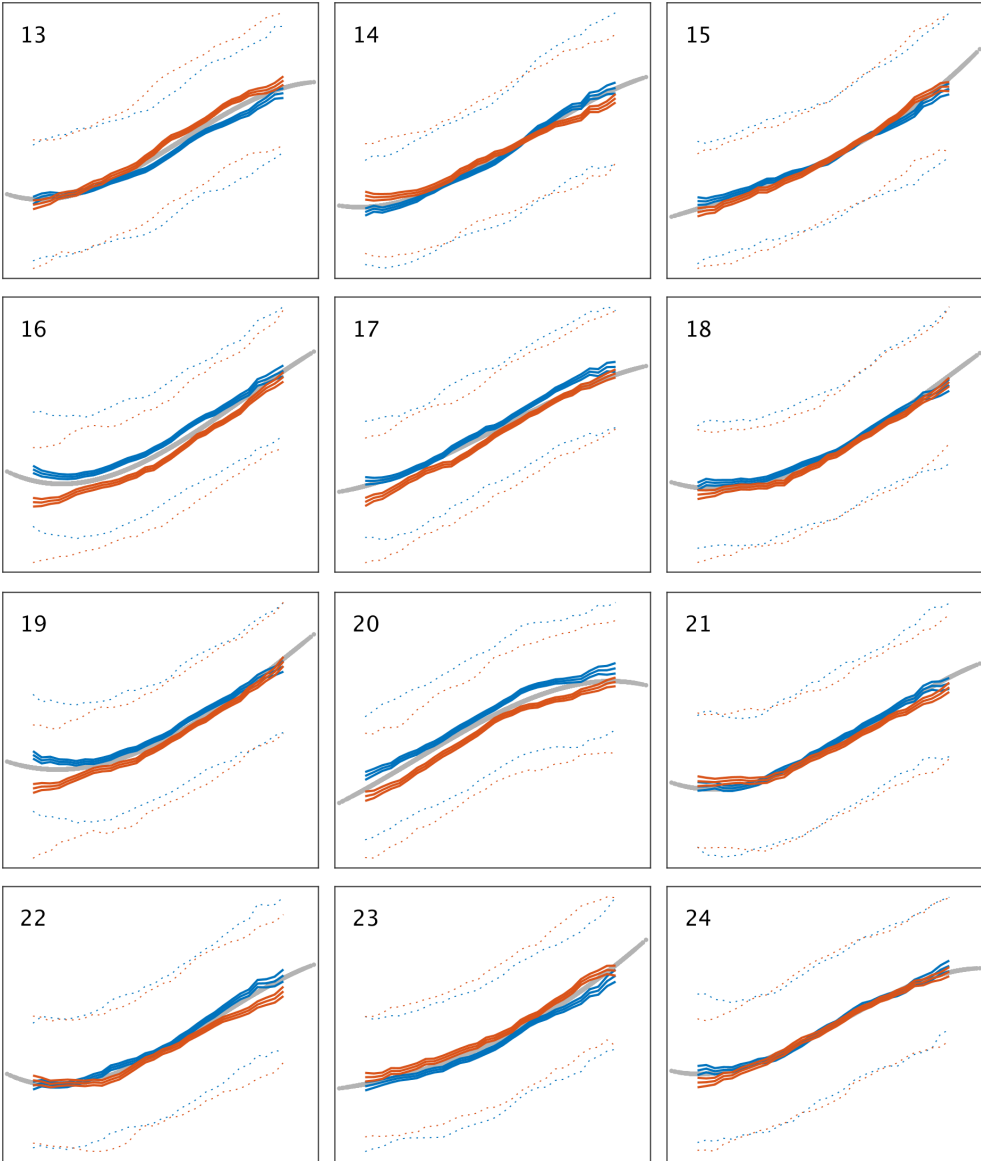

Sex-separated age curves for modes 13-24

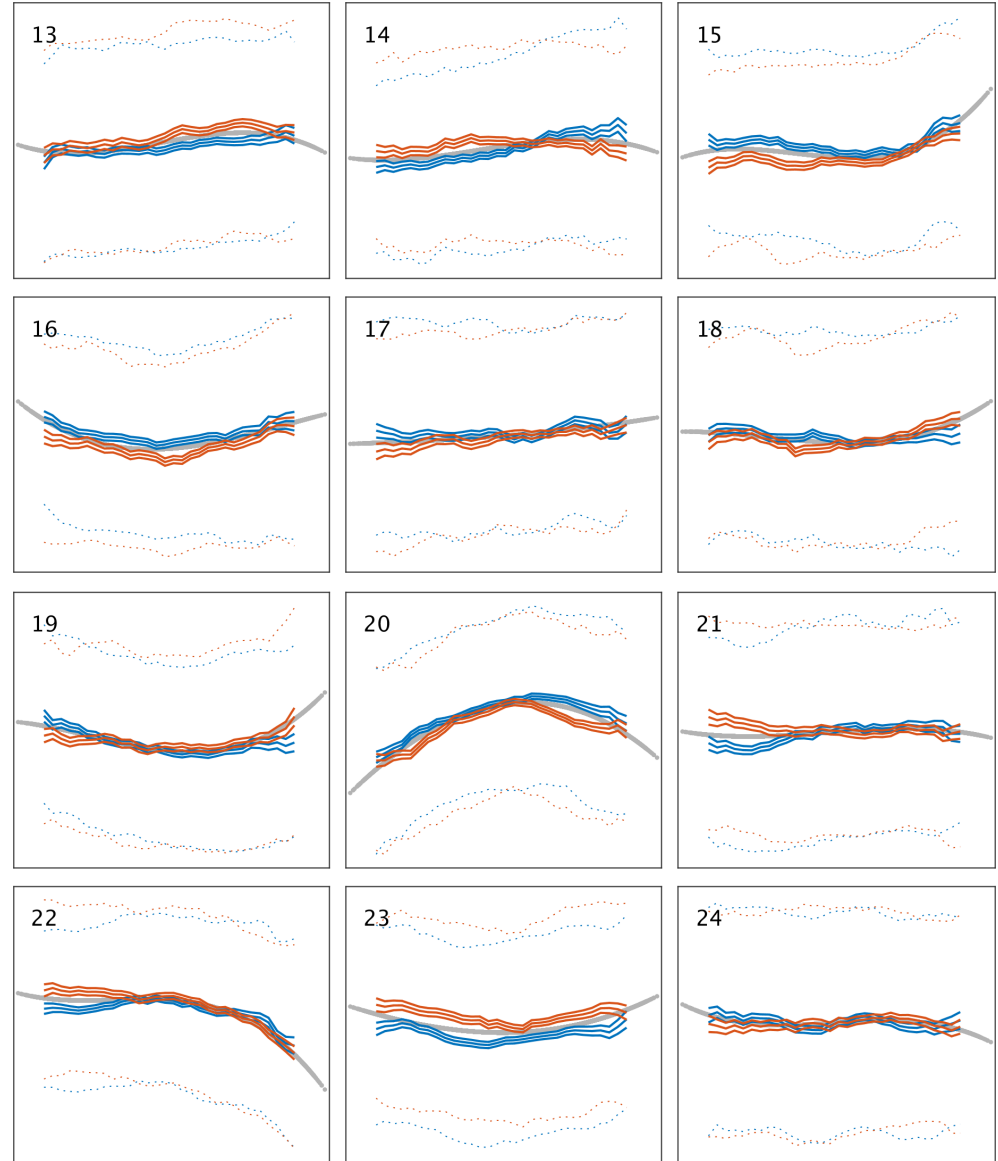

Sex-separated age curves for partialled modes 13-24

Supplement: supp [file elife_poa_e52677_Figure_1_figure_supplement_4.pdf › elife_poa_e52677_Figure_1_figure_supplement_4.pdf]

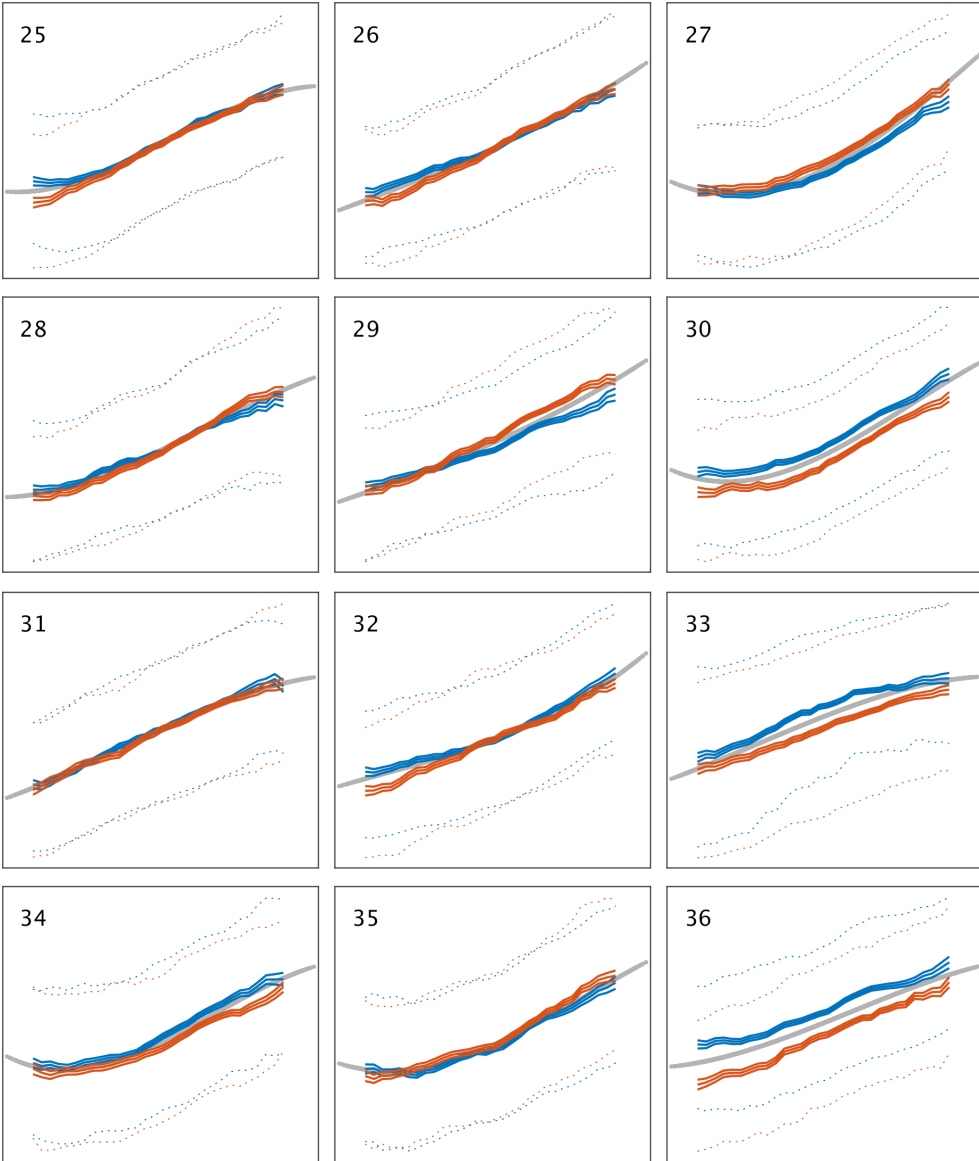

Sex-separated age curves for modes 25-36

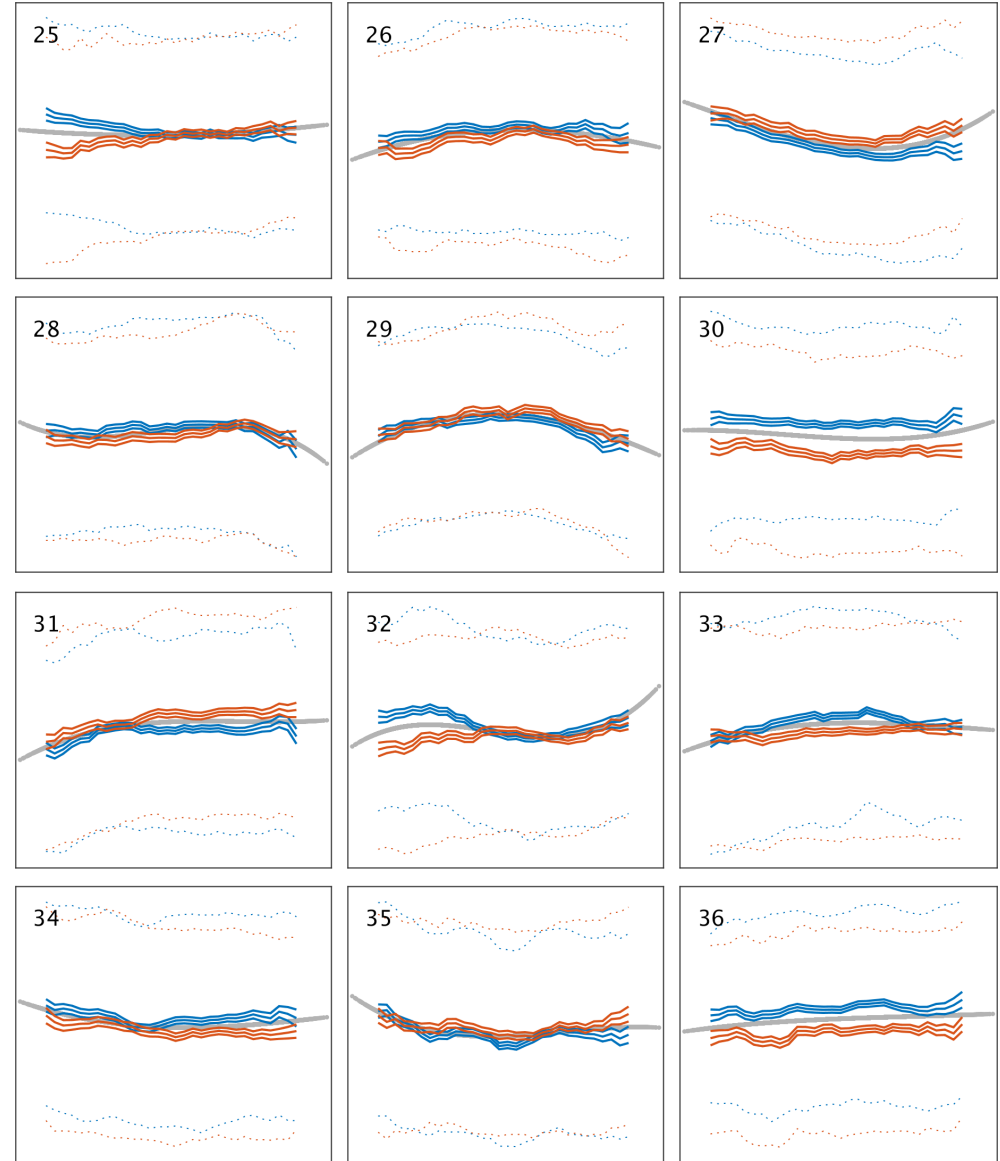

Sex-separated age curves for partialled modes 25-36

Supplement: supp [file elife_poa_e52677_Figure_1_figure_supplement_5.pdf › elife_poa_e52677_Figure_1_figure_supplement_5.pdf]

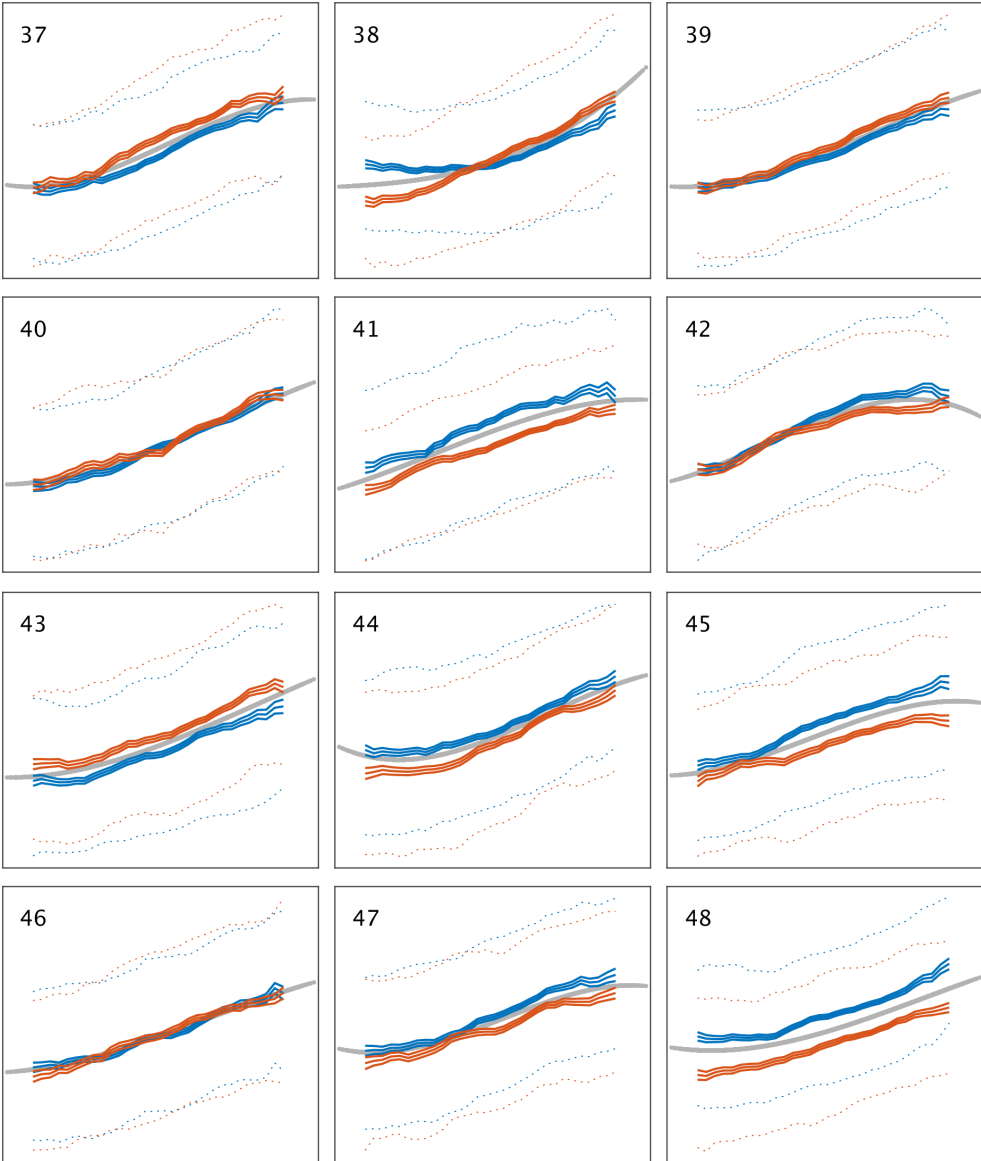

Sex-separated age curves for modes 37-48

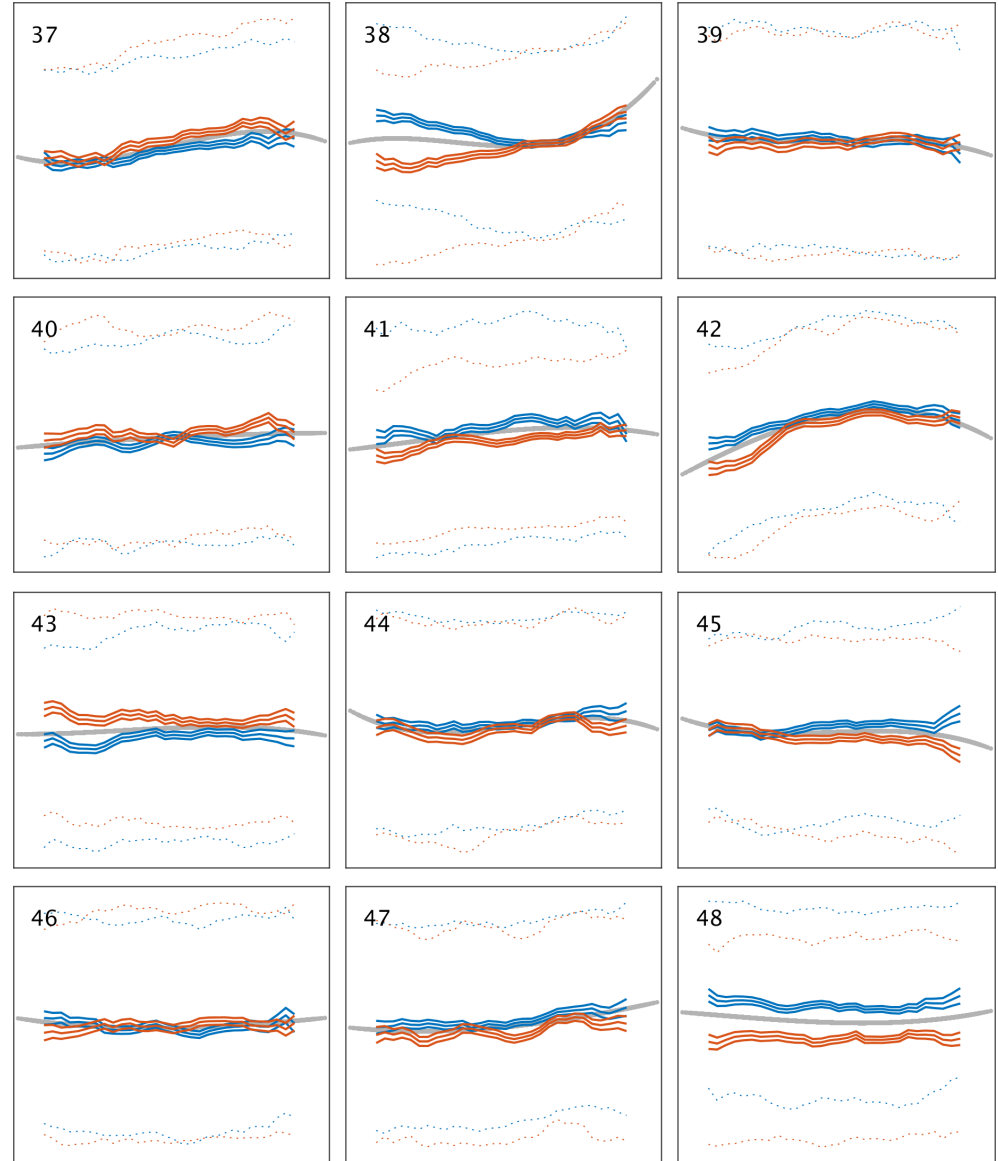

Sex-separated age curves for partialled modes 37-48

Supplement: supp [file elife_poa_e52677_Figure_1_figure_supplement_6.pdf › elife_poa_e52677_Figure_1_figure_supplement_6.pdf]

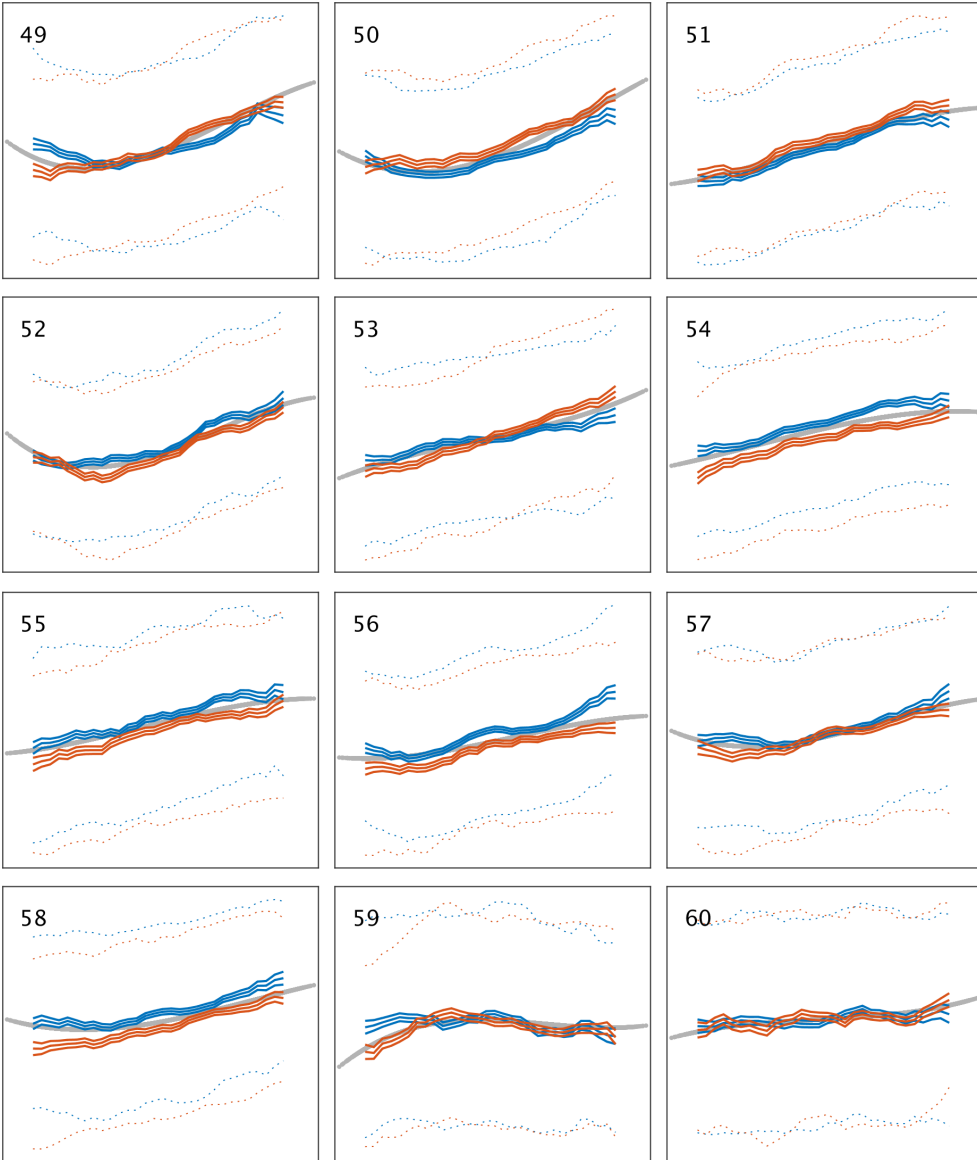

Sex-separated age curves for modes 49-60

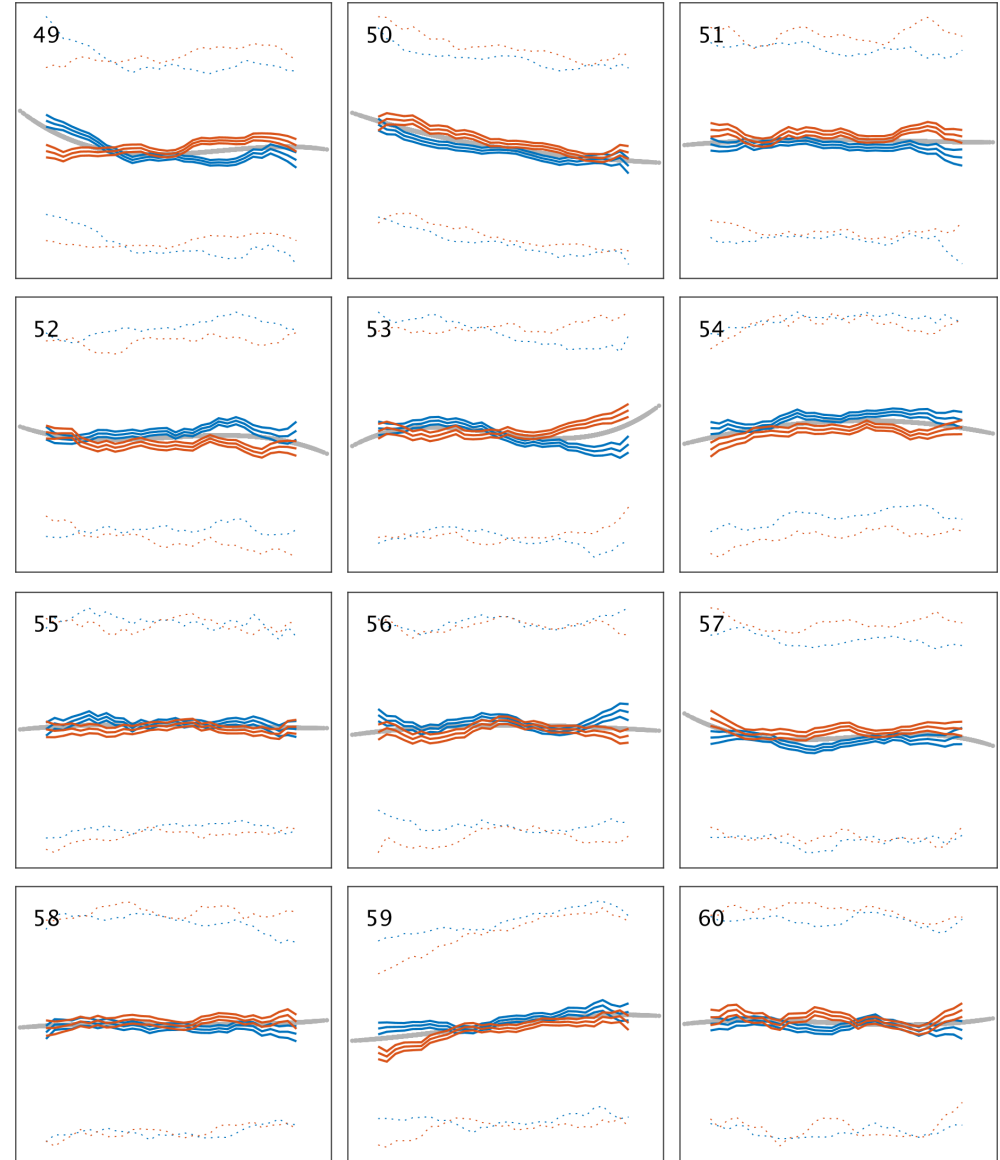

Sex-separated age curves for partialled modes 49-60

Supplement: supp [file elife_poa_e52677_Figure_1_figure_supplement_7.pdf › elife_poa_e52677_Figure_1_figure_supplement_7.pdf]

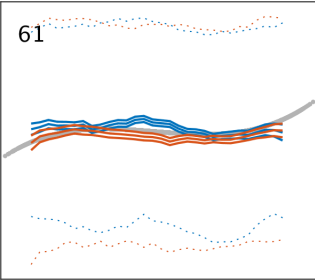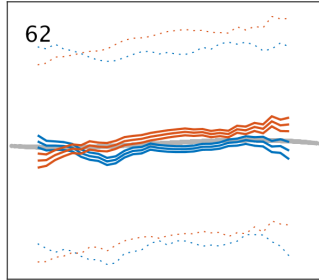

**Sex-separated age curves for modes 61-62**

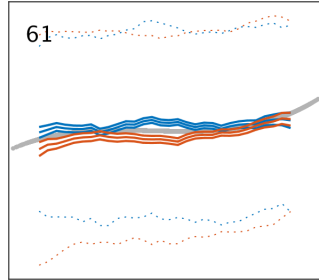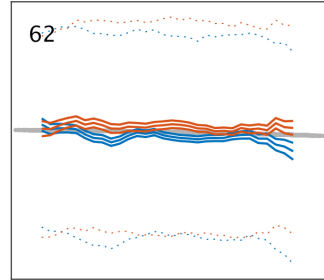

**Sex-separated age curves for partialled modes 61-62**

Supplement: supp [file elife_poa_e52677_Figure_1_figure_supplement_8.pdf › elife_poa_e52677_Figure_1_figure_supplement_8.pdf]

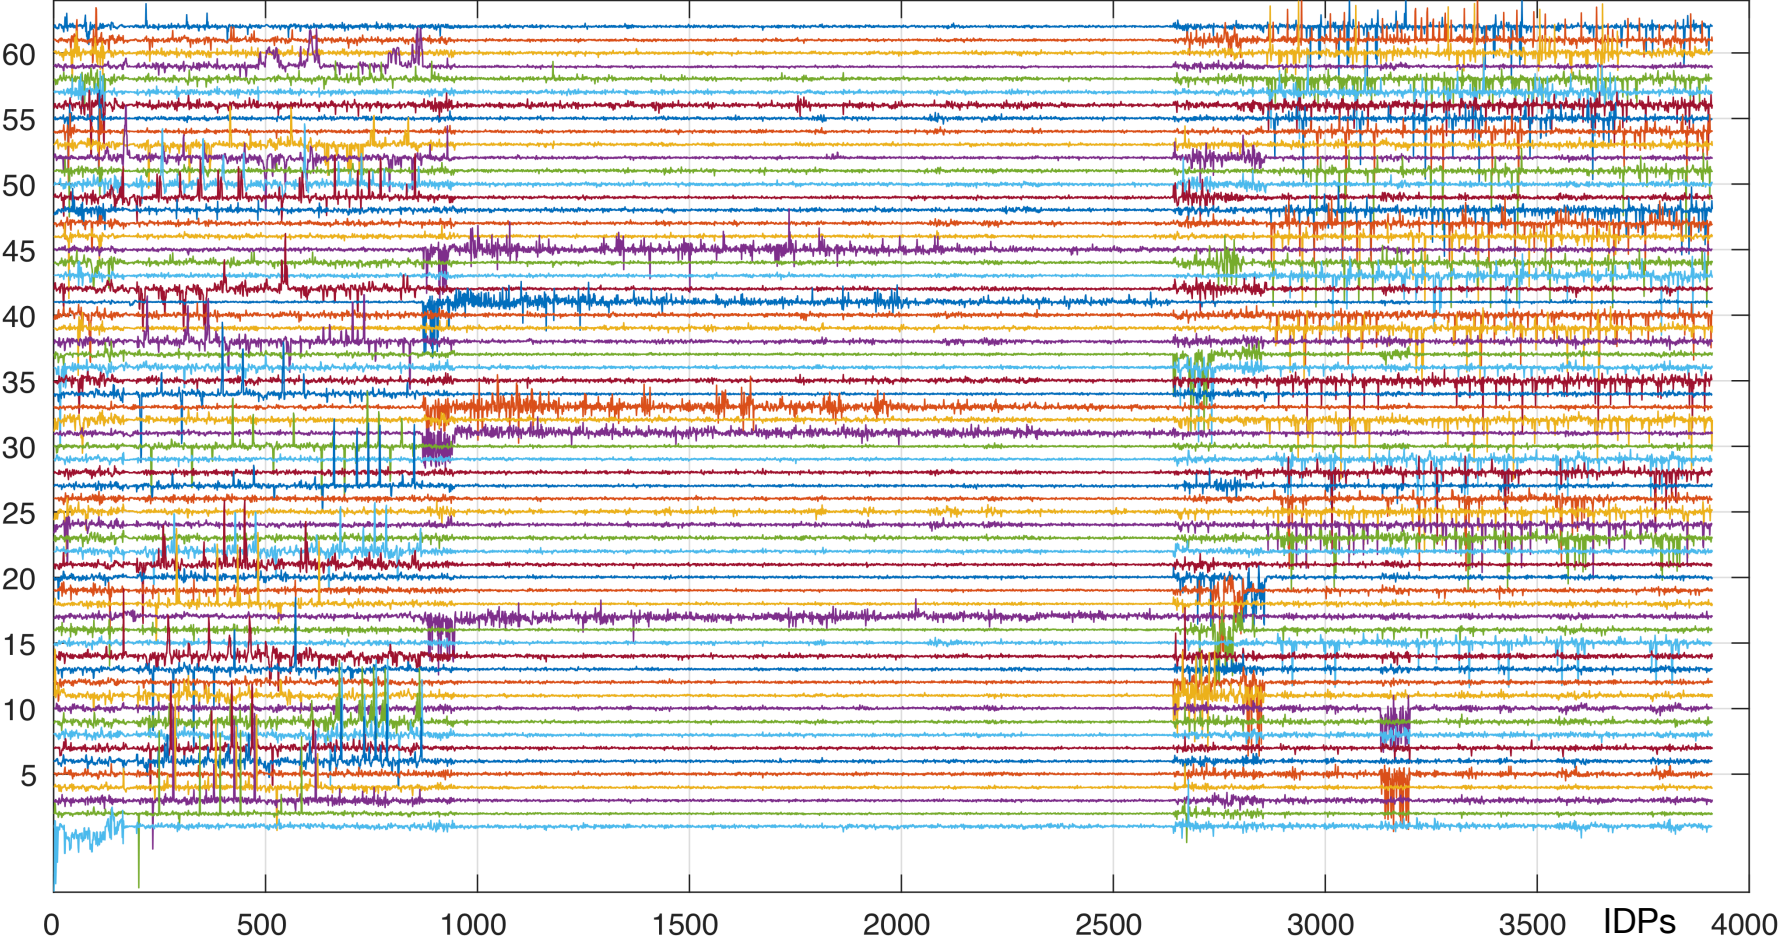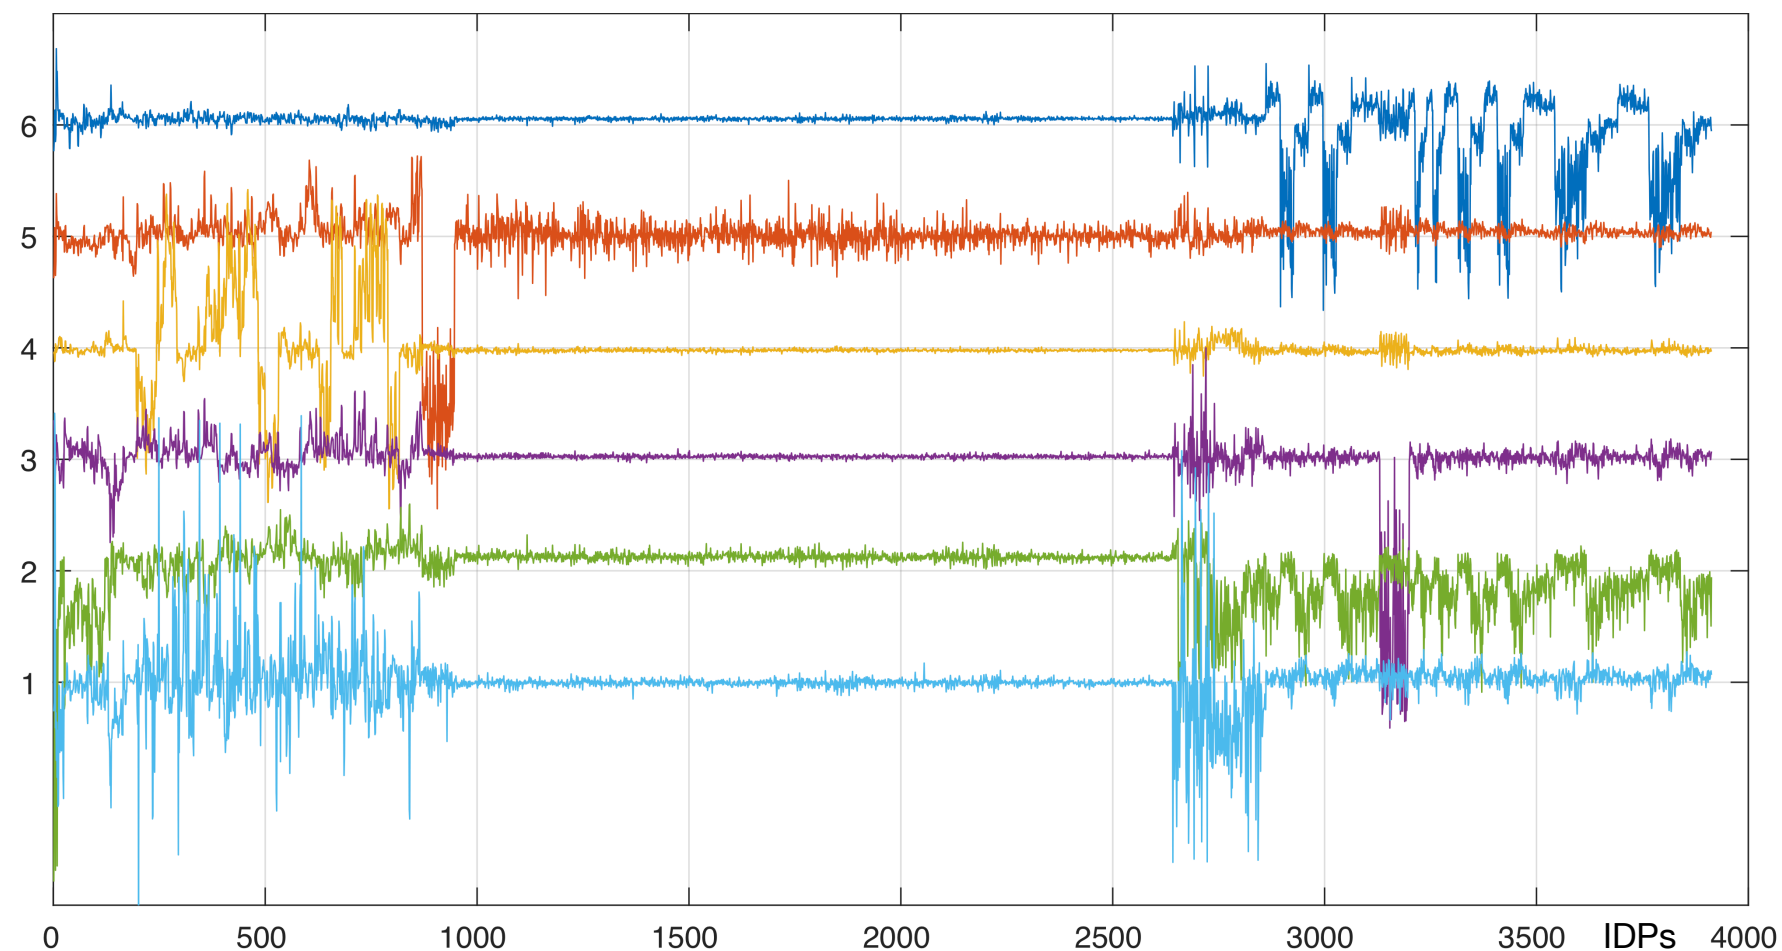

Supplement: supp [file elife_poa_e52677_Figure_2_figure_supplement_1.pdf › elife_poa_e52677_Figure_2_figure_supplement_1.pdf]

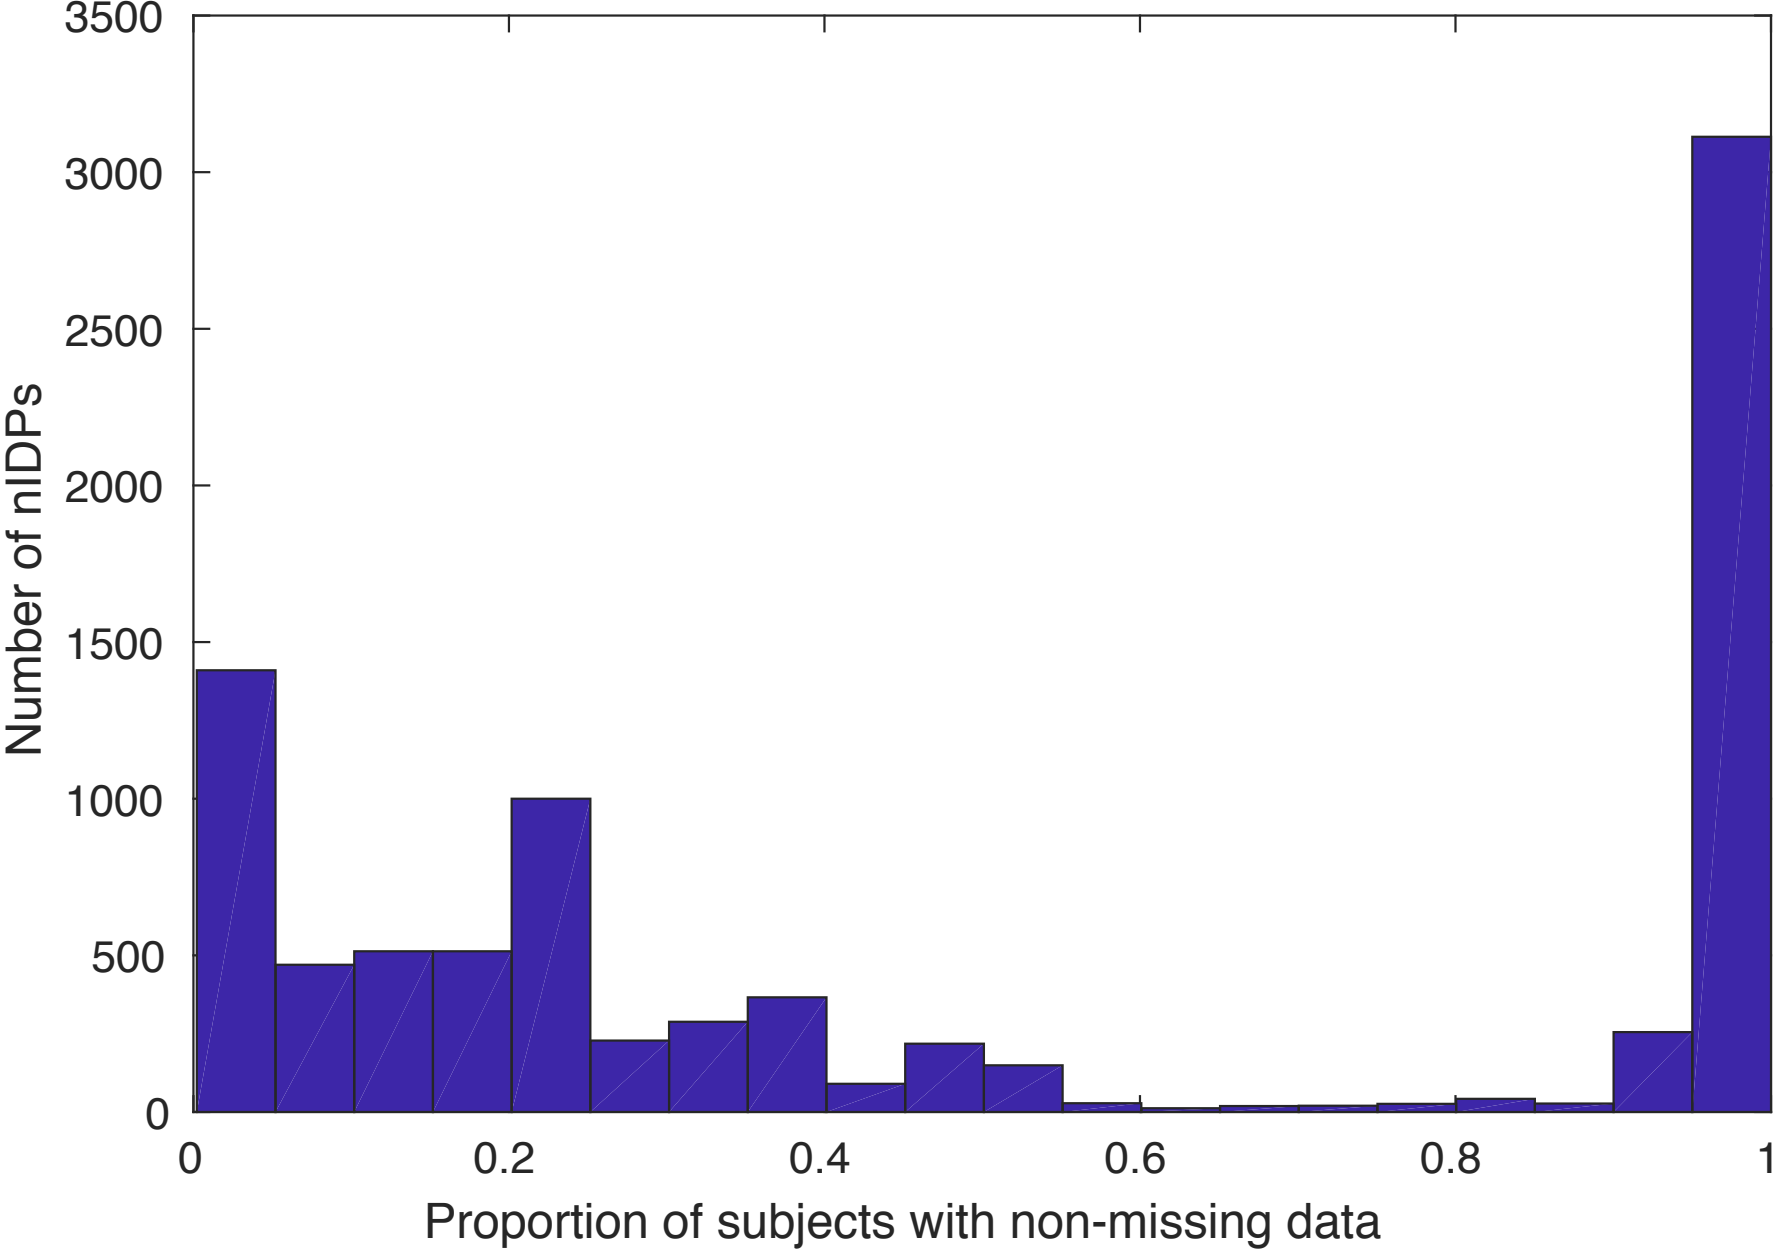

Supplement: supp [file elife_poa_e52677_Figure_2_figure_supplement_2.pdf › elife_poa_e52677_Figure_2_figure_supplement_2.pdf]

**A**  
62 modes

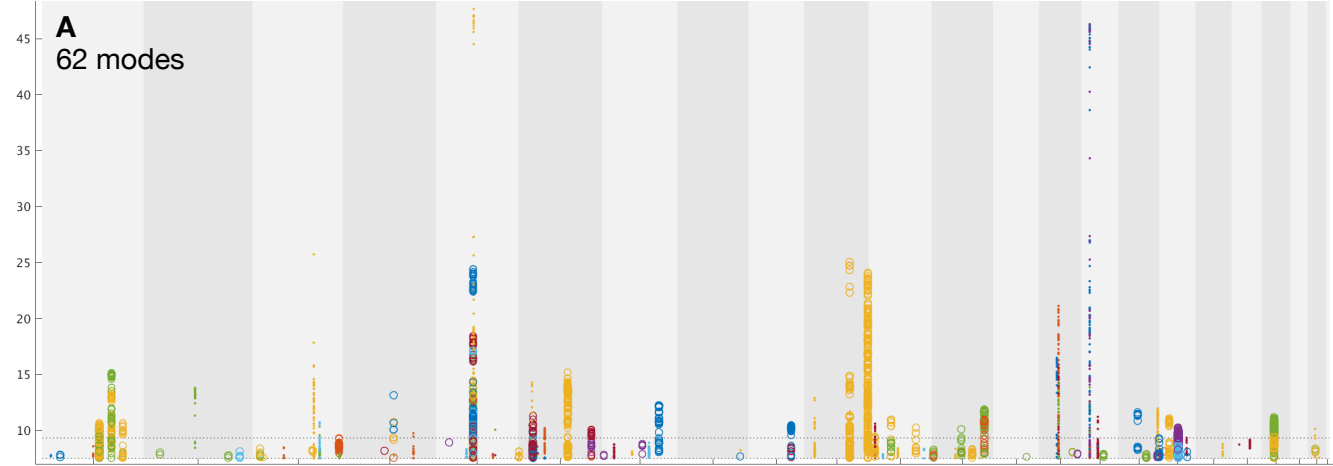

**B**  
62 modes  
(partialled deltas)

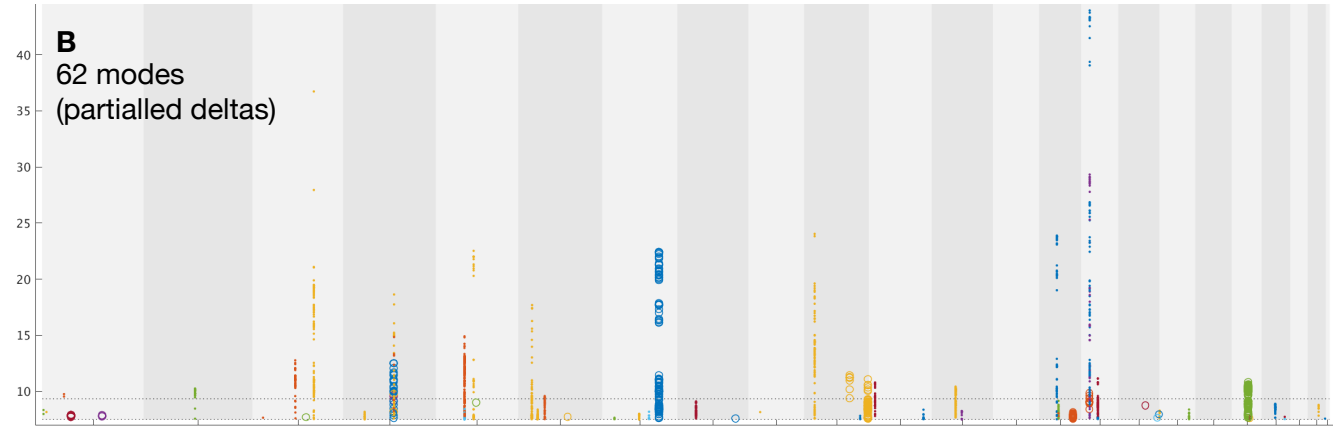

**C**  
6 mode-clusters  
1 2 3 4 5 6

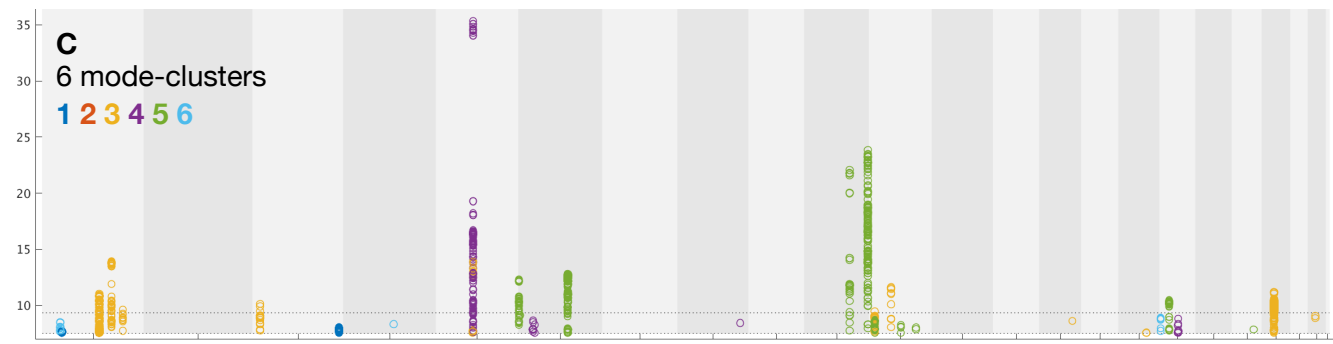

**D**  
6 mode-clusters  
(partialled deltas)

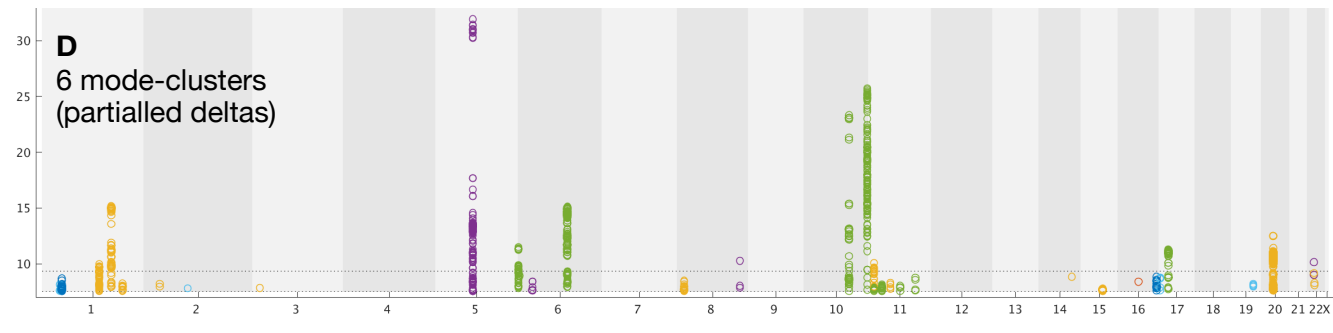

Supplement: supp [file elife_poa_e52677_Figure_3_figure_supplement_1.pdf › elife_poa_e52677_Figure_3_figure_supplement_1.pdf]

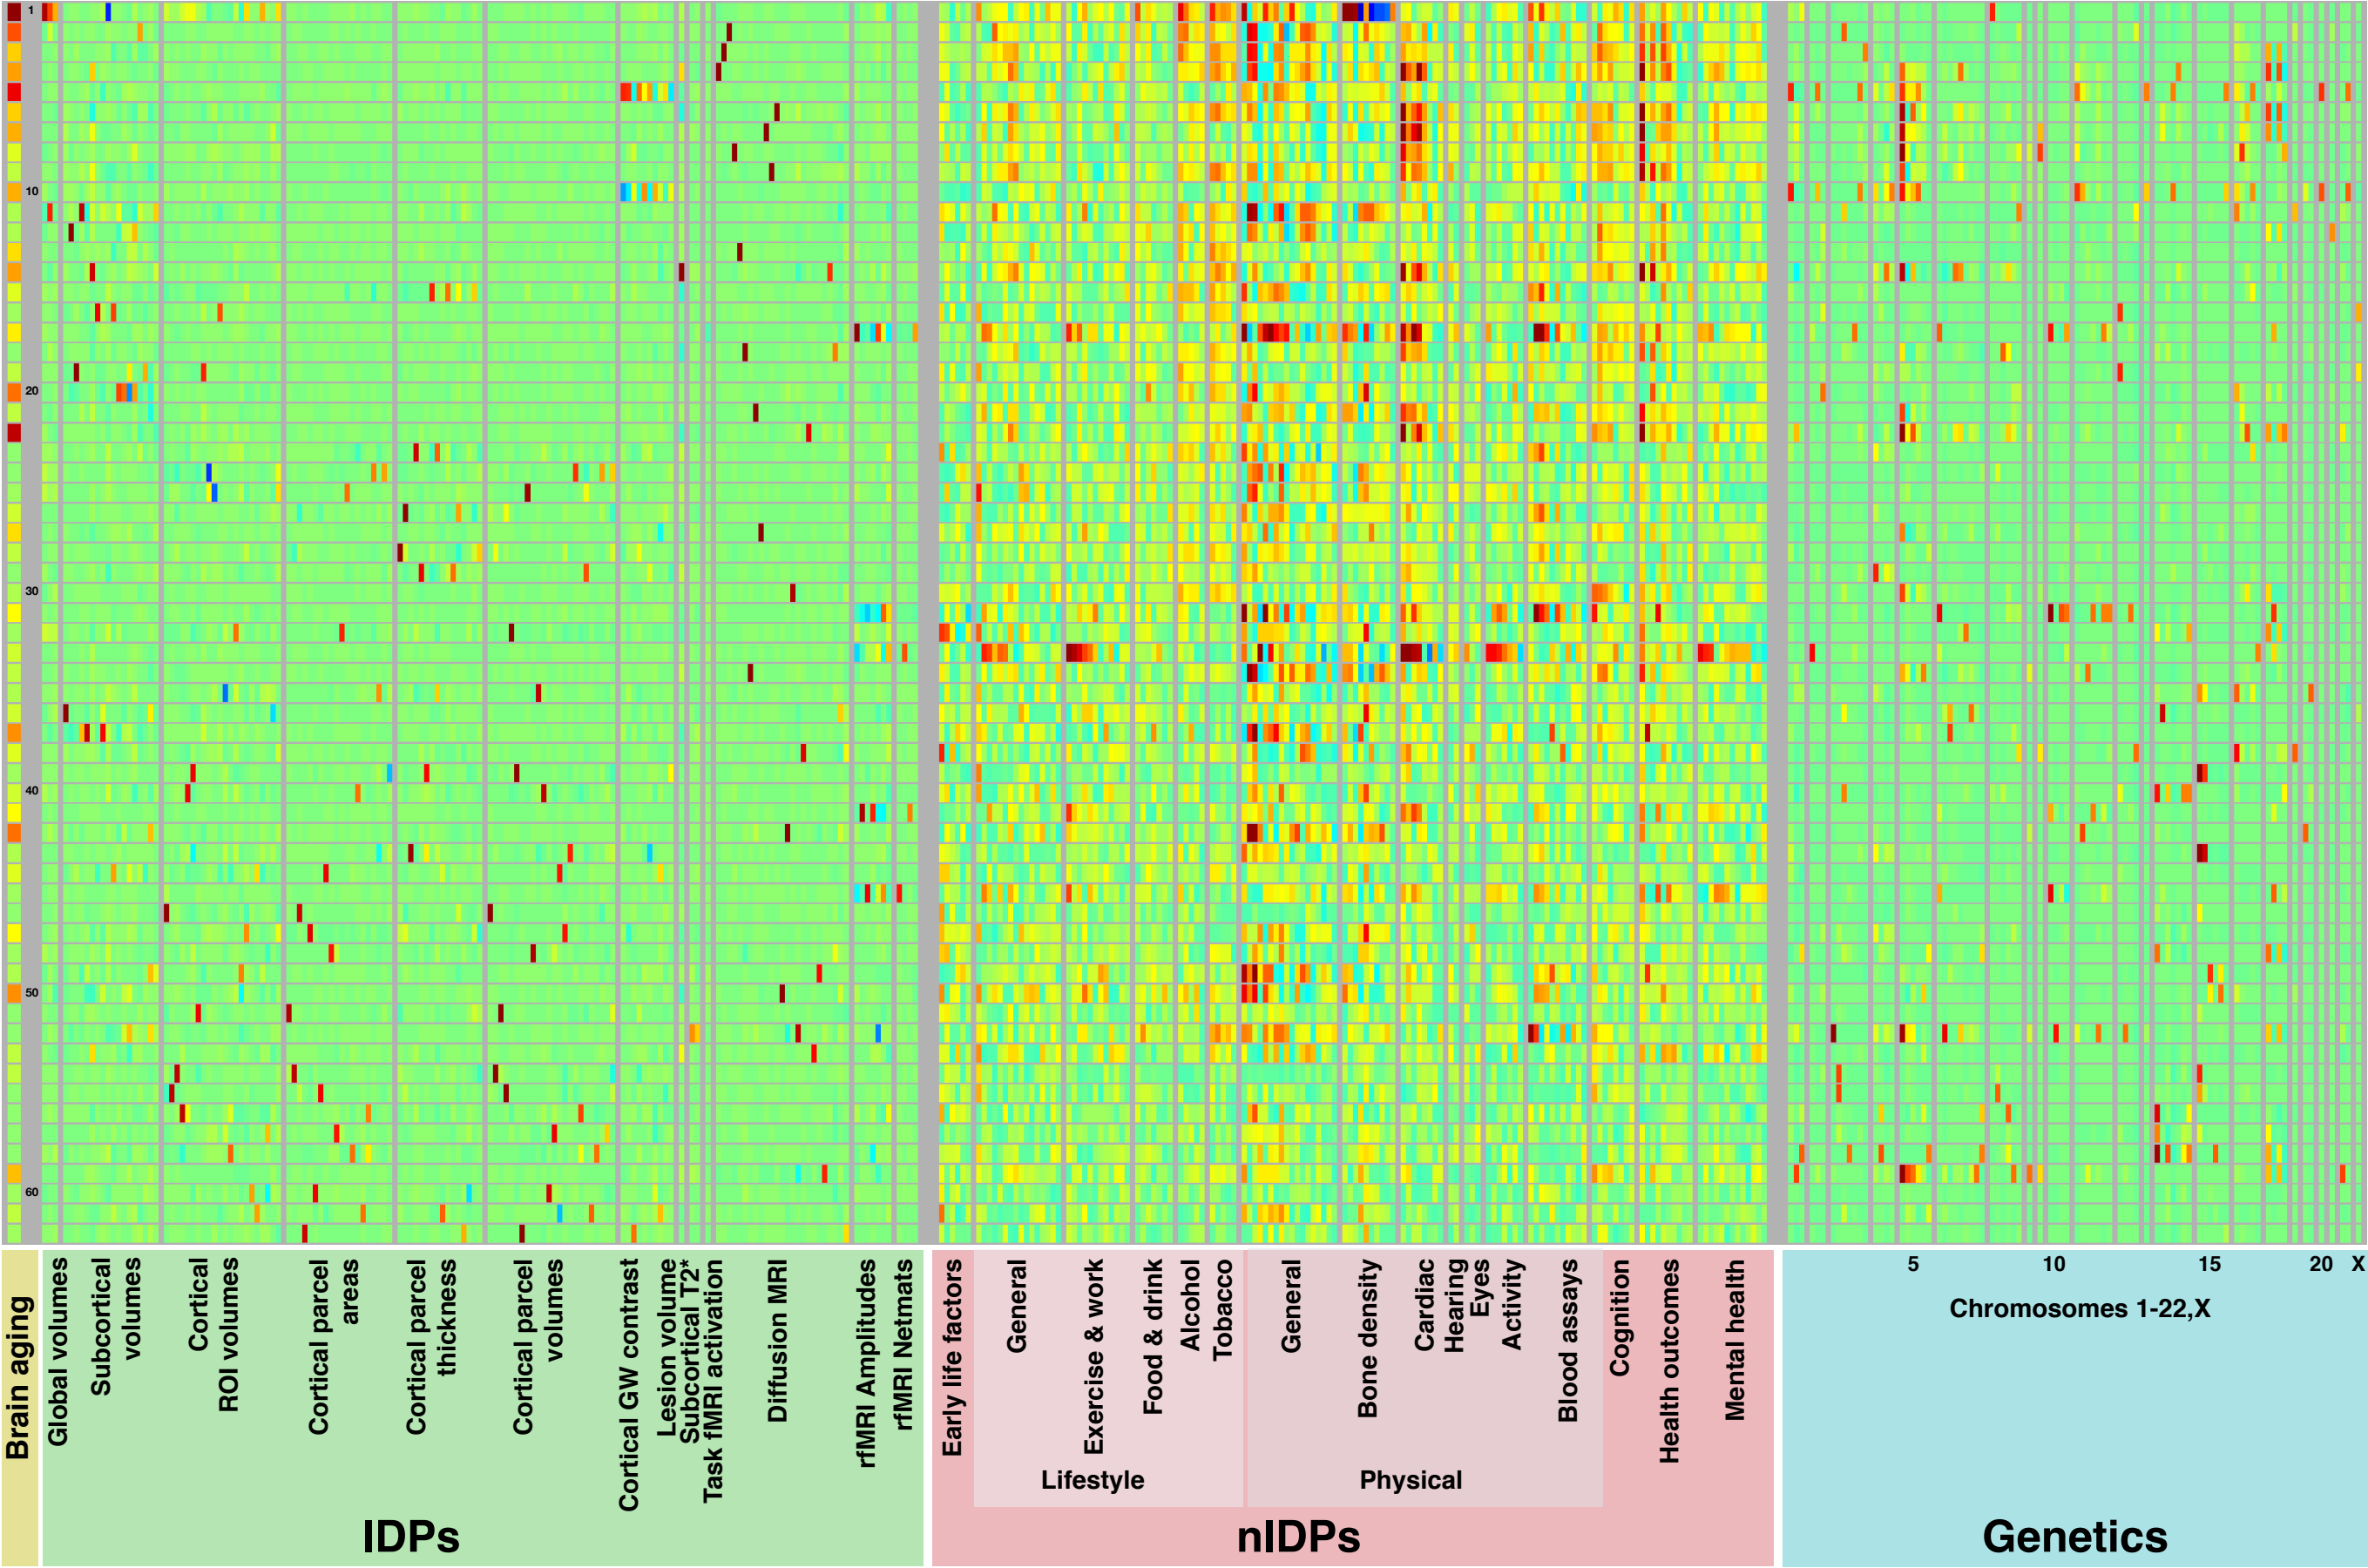

Supplement: supp [file elife_poa_e52677_Figure_3_figure_supplement_2.pdf › elife_poa_e52677_Figure_3_figure_supplement_2.pdf]

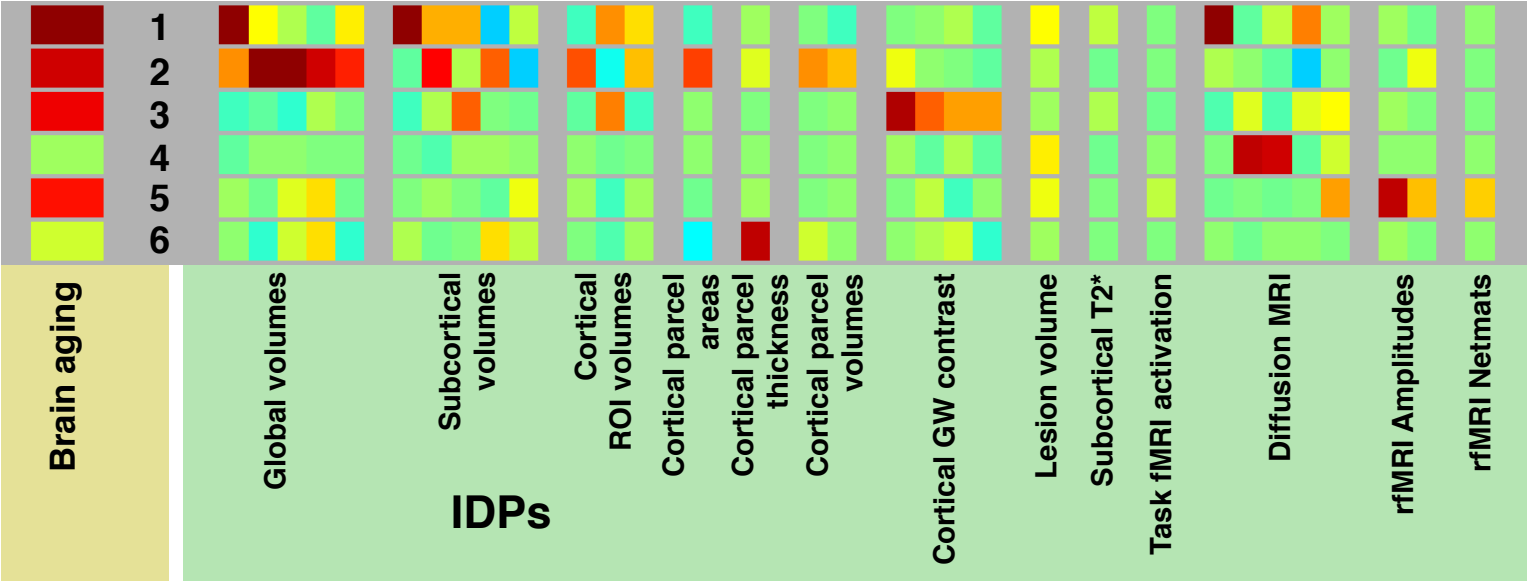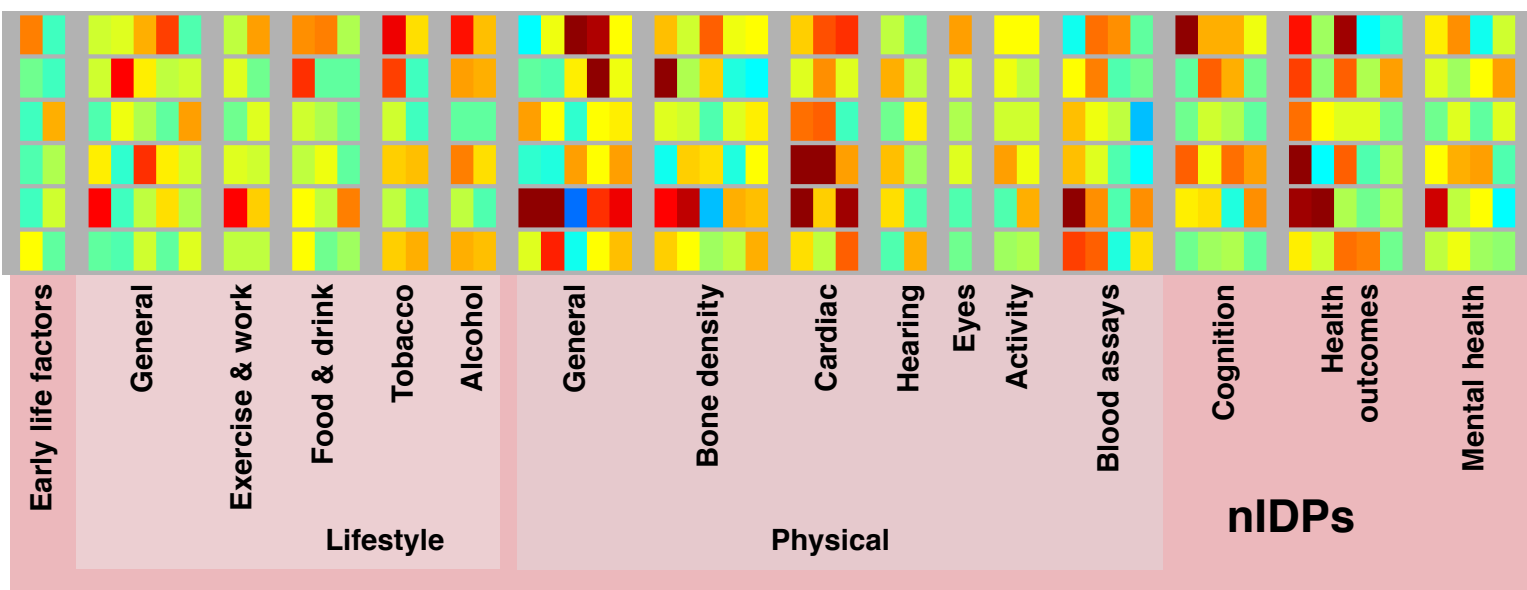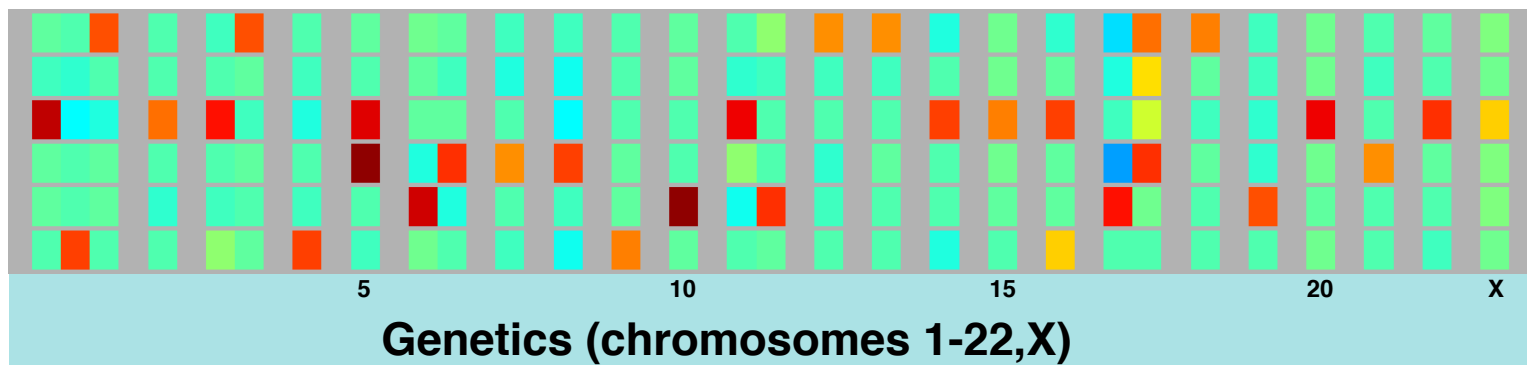

Supplement: supp [file elife_poa_e52677_Figure_3_figure_supplement_3.pdf › elife_poa_e52677_Figure_3_figure_supplement_3.pdf]
